1 **PETISCO is a novel protein complex required for 21U RNA biogenesis and embryonic**  
2 **viability**

3

4 Ricardo J. Cordeiro Rodrigues<sup>1</sup>, António Miguel de Jesus Domingues<sup>1</sup>, Svenja Hellmann<sup>1</sup>,  
5 Sabrina Dietz<sup>2</sup>, Bruno F. M. de Albuquerque<sup>1,3</sup>, Christian Renz<sup>4</sup>, Helle D. Ulrich<sup>4</sup>, Falk Butter<sup>2</sup>,  
6 René F. Ketting<sup>1</sup>

7

8 Institute of Molecular Biology (IMB), Ackermannweg 4, 55128, Mainz, Germany

9 <sup>1</sup>IMB, Biology of Non-coding RNA Group

10 <sup>2</sup>IMB, Quantitative Proteomics Group

11 <sup>3</sup>Graduate Program in Areas of Basic and Applied Biology, University of Porto, 4099-003  
12 Porto, Portugal.

13 <sup>4</sup>IMB, Maintenance of Genome Stability Group

14 correspondence: r.ketting@imb.de

15

16 ORCID Ketting: 0000-0001-6161-5621

17 ORCID Rodrigues: 0000-0002-0541-2229

18 ORCID Domingues: 0000-0002-1803-1863

19 ORCID Renz: 0000-0003-3164-3597

20 ORCID Ulrich: 0000-0003-0431-2223

21 **Abstract**

22

23 Piwi proteins are important for germ cell development in almost all animals studied thus far.  
24 These proteins are guided to specific targets, such as transposable elements, by small guide  
25 RNAs, often referred to as piRNAs, or 21U RNAs in *C. elegans*. In this organism, even though  
26 genetic screens have uncovered a number of potential 21U RNA biogenesis factors, little is  
27 known about how these factors interact or what they do. Based on the previously identified  
28 21U biogenesis factor PID-1, we here define a novel protein complex, PETISCO, that is  
29 required for 21U RNA biogenesis. PETISCO contains both potential 5'-cap and 5'-phosphate  
30 RNA binding domains, suggesting involvement in 5' end processing. We define the  
31 interaction architecture of PETISCO and reveal a second function for PETISCO in embryonic  
32 development. This essential function of PETISCO is not mediated by PID-1, but by TOST-1.  
33 Vice versa, TOST-1 is not involved in 21U RNA biogenesis. Both PID-1 and TOST-1 are small,  
34 intrinsically disordered proteins that interact directly with the PETISCO protein ERH-2  
35 (enhancer of rudimentary homolog 2) using a conserved sequence motif. Finally, our data  
36 suggest an important role for TOST-1:PETISCO in SL1 homeostasis in the early embryo. Our  
37 work describes the first molecular platform for 21U RNA production in *C. elegans*, and  
38 strengthens the view that 21U RNA biogenesis is built upon a much more widely used,  
39 snRNA-related pathway.

## 40 Introduction

41 Germ cells in many organisms depend critically on the integrity of a small RNA-driven  
42 pathway known as the piRNA pathway<sup>1,2</sup>. This pathway is characterized by members of the  
43 Piwi protein family that, bound to their small RNA cofactors (piRNAs), act in gene-regulatory  
44 and transposon silencing pathways<sup>3,4</sup>. In the absence of these pathways, germ cells do not  
45 form properly, ultimately leading to sterility. Even though this type of pathway is found in  
46 the germ cells of most, if not all animals, the mechanistic details of the Piwi pathways are  
47 remarkably different. In flies, for example, a piRNA amplification loop, driven by two Piwi  
48 paralogs, is coupled to the activity of a third, nuclear Piwi protein that drives transcriptional  
49 silencing<sup>5,4</sup>. In other animals, such as the silk moth, the nuclear branch seems to be absent,  
50 while the Piwi amplification loop is present<sup>6</sup>, and in mice a linear Piwi pathway drives  
51 nuclear accumulation of a Piwi protein<sup>4</sup>. While transposons represent major targets for  
52 these pathways, it is also clear that non-transposon targets are functionally relevant for  
53 these pathways<sup>7</sup>.

54

55 In *C. elegans*, the main Piwi protein is named PRG-1 (piwi related gene 1) and the small RNA  
56 co-factors bound by PRG-1 are known as 21U RNAs<sup>8-10</sup>. This name stems from the fact that  
57 these small RNAs are 21 nucleotides long, and have a strong bias for a 5' uracil. Target RNA  
58 recognition by PRG-1:21U complexes does not depend on full-length base-pairing between  
59 the 21U RNA and the target RNA<sup>11,12</sup>, and results in the recruitment of RNA-dependent RNA  
60 polymerase activity, that drives the synthesis of so called 22G RNAs<sup>8,9</sup>. These 22G RNAs,  
61 named after their predominant 22 nucleotide length and 5' G bias, are bound by argonaute  
62 proteins that are specific for nematodes (also referred to as WAGO-proteins), that ultimately  
63 drive the silencing of the 21U target.

64

65 In absence of PRG-1, the germline deteriorates over generations, eventually leading to  
66 sterility<sup>13</sup>. The defects that accumulate are most likely not genetic in nature, since the  
67 phenotype can be reverted by, for instance, starvation<sup>13</sup>. These observations have led to the  
68 suggestion that in *prg-1* mutants a form of stress accumulates and ultimately leads to germ  
69 cell dysfunction<sup>14</sup>. More acute fertility defects can be observed in *prg-1* mutants when the  
70 22G RNA biogenesis machinery is reactivated in zygotes, after being defective in both of the  
71 parents. In this case, maternally provided PRG-1:21U complexes are required to prevent

72 immediate sterility, by preventing accumulation of 22G RNA populations that  
73 inappropriately silence genes that should be expressed<sup>15,16</sup>. This demonstrates that PRG-1,  
74 and its bound 21U RNA, has a critical function in maintaining a properly tuned 22G RNA  
75 population in the germ cells. Nevertheless, the impact of PRG-1 on transposon silencing is  
76 rather modest, as in *prg-1* mutants only activation of the Tc3 transposon has thus far been  
77 demonstrated<sup>8</sup>.

78  
79 Interestingly, the silencing of a 21U target, at least a transgenic one, can become  
80 independent of 21U RNAs themselves<sup>5,17,18</sup>. In this state, which has been named RNAe (for  
81 RNAi induced epigenetic silencing), the silencing has been completely taken over by a self-  
82 sustaining 22G RNA response. This includes a nuclear component that changes the histone  
83 methylation status of the targeted transgene, driven by the nuclear Argonaute protein  
84 HRDE-1<sup>5,17-19</sup>. Possibly, such an RNAe state may explain why transposons are not more  
85 broadly upregulated in *prg-1* mutants, because in *prg-1;hrde-1* double mutants the Tc1  
86 transposon is strongly activated<sup>15</sup>. How exactly RNAe is established is not clear, but once it  
87 is, it can be extremely stable, for over tens or more of generations<sup>5,17,18</sup>.

88  
89 Given the important function of 21U RNAs driving a potentially very powerful silencing  
90 response, the biogenesis of 21U RNAs is a critical process for the germ cells of *C. elegans*.  
91 Nevertheless, very little is known about the mechanistic steps of this process. The large  
92 majority of genes encoding 21U RNAs are found in two main clusters on chromosome IV,  
93 and are characterized by a very specific sequence motif in their promoter that defines the 5'  
94 end of the mature 21U RNA<sup>20</sup>. Transcription of these genes requires a protein named PRDE-  
95 1 and the transcription factor SNPC-4<sup>21,22</sup>, the latter of which is also known to be involved in  
96 transcription of other short structural RNAs, such as snRNAs and splice-leader RNAs<sup>21</sup>. An  
97 evolutionary analysis of 21U RNA loci in diverse nematodes has revealed that 21U loci may  
98 have evolved from snRNA loci<sup>23</sup>. These loci include both the strongly conserved U1, U2 loci,  
99 as well as loci producing so-called splice leader RNAs (SL1 and SL2), that are trans-spliced to  
100 the 5' ends of a large fraction of all mRNAs in *C. elegans*<sup>24</sup>. These observations raise the  
101 possibility that also other aspects of the 21U RNA pathway may have mechanistic links to  
102 snRNA biogenesis.

103

104 The 21U RNA precursor transcripts are short, around 27 nucleotides, and capped<sup>25</sup>. Even  
105 though a biochemical reconstitution of the processing has not been achieved thus far, the  
106 available data suggest the following order of steps in the maturation of the 21U precursor  
107 transcripts into mature 21U RNAs<sup>20,22,25-27</sup>. First, the precursors are most likely processed at  
108 the 5' end, resulting in de-capping and removal of two nucleotides. The enzymes involved  
109 have not yet been identified, and whether this reaction is mediated by endo- or exo-  
110 nucleolytic activities is not clear. This step is likely followed by loading of the 5'processed  
111 precursor into PRG-1 and trimming of the 3' end by the 3'-5' exonuclease PARN-1<sup>28</sup>. Finally,  
112 the 3' end is 2'-O-methylated by HENN-1<sup>29-31</sup>. Not much is known about other proteins  
113 acting at these 21U maturation steps, even though a number of genes have been implicated  
114 in this process<sup>21,22,26,27 32</sup>.

115  
116 Here, we follow up on our previous identification of PID-1 (piRNA induced silencing defective  
117 1) as a protein essential for 21U RNA production<sup>26</sup>. Mutants lacking PID-1 produce very low  
118 amounts of mature 21U RNAs, and the 21U-related molecules that remain tend to be  
119 precursor transcripts, suggesting PID-1 acts at some step in 21U precursor processing. Other  
120 factors potentially acting at this step of 21U biogenesis, TOFU-1, 2, 6 and 7, were identified  
121 in a genome-wide RNAi screen<sup>27</sup>. How these factors interconnect, however, remained  
122 unclear. We find, using immuno-precipitation (IP) and label free quantitative mass  
123 spectrometry (IP-MS), that PID-1 interacts with two proteins that were identified in a  
124 genome-wide RNAi screen for 21U RNA biogenesis factors: TOFU-6 and the unnamed protein  
125 Y23H5A.3, henceforth referred to as PID-3. In addition, we identify two strongly conserved  
126 proteins interacting with PID-1: IFE-3, a *C. elegans* eIF4E homolog, and ERH-2, one of the *C.*  
127 *elegans* homologs of 'enhancer of rudimentary'. Enhancer-of-rudimentary homologs are  
128 evolutionary very well conserved proteins, with homologs being present from plants to man.  
129 Its mechanistic role is not very well established, but in *Schizosaccharomyces pombe* ERH1  
130 drives the decay of meiotic transcripts, and interacts with the nuclear exosome and the  
131 nuclear CCR4-NOT complex<sup>33</sup>. Since we always find PID-3, ERH-2, TOFU-6 and IFE-3 together  
132 in a complex we named it PETISCO, for PID-3, ERH-2, TOFU-6, IFE-3 small RNA Complex. All  
133 PETISCO proteins are required for 21U biogenesis. Additionally, PETISCO mutants display a  
134 maternal effect lethal (Mel) phenotype, whereas *pid-1* and *prg-1* mutants are viable. We find  
135 that this is caused by the fact that besides binding to PID-1, PETISCO can bind a protein with

136 similarities to PID-1. We named this protein TOST-1, for Twenty-One U pathway antagonist.  
137 Mutants for *tost-1* produce 21U RNAs, display enhanced 21U-driven silencing and have a  
138 Mel phenotype. PID-1 and TOST-1 both interact with ERH-2 using a conserved motif, strongly  
139 suggesting a mutually exclusive mode of binding to PETISCO, where PID-1 implicates it in  
140 21U RNA biogenesis and TOST-1 in another pathway that is essential for embryonic viability.  
141 Our data suggest that this pathway may be involved in providing the embryo with resources  
142 required for trans-splicing, especially with the SL1 splice leader RNA.

143

144 With these findings, we pave the way for a better understanding of how 21U precursor  
145 transcripts are processed. The identification of PETISCO, plus its implication in at least two  
146 distinct processes provides the new insight that 21U RNA processing is closely related to a  
147 more widely conserved process: that of snRNP biogenesis. Combined with the fact that 21U  
148 RNA transcription also bears strong signatures of an snRNA-history, an image arises in which  
149 the 21U RNA pathway may have evolved out of an already existing small non-coding RNA  
150 network that became linked to an Argonaute-driven gene-silencing program.

## 151 Results

### 152 Identification of PID-1 interactors

153 To identify proteins interacting with the 21U biogenesis factor PID-1<sup>26</sup> we performed IPs  
154 with PID-1 specific antibodies, followed by protein identification using mass spectrometry  
155 (IP-MS). As control, we precipitated PID-1 from two independent *pid-1* loss of function  
156 strains. Both experiments identified a rather restricted set of proteins (Figure 1a, S1a).  
157 TOFU-6 and PID-3 were identified as the most prominent PID-1 interactors, and for the latter  
158 we further validated the interaction with PID-1 through IP-Western blotting (Figure S1b).  
159 Given that these two proteins were identified in an RNAi-screen for 21U biogenesis factors  
160<sup>27</sup>, we considered these as functionally relevant PID-1 interactors. TOFU-6 is a protein with a  
161 Tudor domain, a potential eIF4E interaction motif and an RRM domain, whereas PID-3 has an  
162 RRM domain and a MID-domain (Figure S1c). Two other proteins were consistently  
163 identified as PID-1 interactors: IFE-3 and ERH-2 (Figure 1a, S1a). IFE-3 is one of the five *C.*  
164 *elegans* homologs of eIF4E. Previous work demonstrated that IFE-3 binds to the 7-  
165 methylguanylate (m7G) Cap<sup>34</sup>. Interestingly, 21U precursor transcripts appear to be not  
166 trans-spliced<sup>25</sup>, implying that they have a m7G Cap structure at their 5' end. Hence, IFE-3  
167 may bind to the 5' cap structure of the 21U precursor transcripts. ERH-2 is one of the two *C.*  
168 *elegans* homologs of a protein known as 'enhancer of rudimentary'. Homologs of this  
169 protein are strongly conserved from plants to mammals. Even though a protein structure for  
170 the human homolog has been described<sup>35</sup>, its molecular function is still unclear. In Figure  
171 S1c we present a schematic of all these PID-1 interactors, with their identified domains.

172  
173 We next probed the subcellular localization of PID-1 and its four identified interactors, by  
174 expressing them from transgenes generated through the so-called miniMos approach (see  
175 methods)<sup>36</sup>. For each gene we used its own promoter and 3' UTR sequences. All transgenes  
176 were able to rescue mutant phenotypes (not shown) indicating the expressed proteins are  
177 functional. All four interactors show a characteristic perinuclear, punctate localization in the  
178 germline syncytium, overlapping partially, but not fully with the P-granule marker PGL-1  
179 (Figure 1b,c). IFE-3 has a clear granular expression in the primordial germ cells in the embryo  
180 (Figure S2b), whereas the remaining interactors show a dispersed cytoplasmic distribution  
181 across the entire early embryo (Figure S2c). These results show that all the identified PID-1

182 interactors are expressed concomitantly in early embryos, and in the germline, where they  
183 are found in close proximity to P-granules.

184

### 185 **PID-1 interactors mutually interact to form PETISCO**

186 To probe to what extent the identified PID-1 interactors reciprocally interact, and to what  
187 extent they in turn interact with additional proteins, we performed IP-MS on TOFU-6, IFE-3,  
188 PID-3 and ERH-2 in young adult animals, using the tagged proteins expressed from the  
189 above-described transgenes. Extracts from non-transgenic wild-type animals were used as  
190 negative controls. As shown in Figure 2a-d, these experiments revealed that all four proteins  
191 co-precipitate with each other. In addition, we also found an uncharacterised protein  
192 (C35D10.13) which systematically co-precipitated with the PID-1 interactors, but was absent  
193 from the PID-1 IPs. This factor, which we named TOST-1, will be further described below.  
194 These interactions are RNase resistant. RNase treatment did not disrupt PID-3 interactions  
195 (Figure S3a), and had very little effect on IFE-3 partners, resulting only in the loss of PID-1  
196 (Figure S3b). We summarize the network of PID-1 interactors in Figure 2e. Given the strong  
197 reciprocal interactions between these proteins, it is likely that they form a discrete complex.  
198 We named this complex PETISCO, for PID-3, ERH-2, TOFU-6, IFE-3 small RNA Complex.

199

200 As mentioned before, IFE-3 is one of the *C. elegans* eIF4E homologs. Surprisingly, in our  
201 experiments we do not detect any of the known translation initiation factors to be  
202 associated with IFE-3. The transgenically expressed IFE-3 does rescue the *ife-3* mutant  
203 phenotype (not shown), implying that IFE-3 may not play a role in initiating translation. We  
204 do detect a number of additional proteins bound to IFE-3 which provide clues to IFE-3  
205 function. One such protein is IFET-1, a homolog of human EIF4E nuclear import factor 1 and  
206 a negative regulator of translation<sup>37</sup>. We further consistently detect many, if not all  
207 components of the SMN complex<sup>38</sup>. The SMN complex plays a major role in snRNP  
208 biogenesis, implicating IFE-3 in this process as well.

209

### 210 **PETISCO architecture**

211 Having established the components of PETISCO, we next dissected the molecular  
212 interactions within this complex. Using the yeast-two-hybrid (Y2H) system we scored  
213 interactions between each possible pair of individual PETISCO subunits (Figure 3a, S4a). This



214 resulted in the following interactions that are most likely to be direct: IFE-3 interacts only  
215 with TOFU-6. TOFU-6 in turn interacts with PID-3, which in turn also interacts with ERH-2.  
216 Finally, PID-1 and TOST-1 were both found to interact only with ERH-2. Self-interaction was  
217 detected for ERH-2, though under lower stringency conditions, indicating that ERH-2 may be  
218 present as a dimer in PETISCO.

219

220 We also investigated which domains of the PETISCO subunits are responsible for the protein  
221 interactions using the same Y2H set-up. The putative eIF4E interaction motif<sup>39 40</sup> within the  
222 C-terminus of TOFU-6 indeed is responsible for the interaction between TOFU-6 and IFE-3  
223 (Figure 3b). No interactions were found for the Tudor domain of TOFU-6. The RRM domain  
224 of TOFU-6 was found to bind to the RRM-domain of PID-3 (Figure 3c), and the same RRM  
225 domain of PID-3 was found to also interact with ERH-2 (Figure 3d). Lower stringency and  
226 control selections of the same experiments are shown in Figures S4b-d). This Y2H set-up did  
227 not allow us to determine if the PID-3 RRM domain can sustain both the TOFU-6 and the  
228 ERH-2 interaction simultaneously, however the fact that we find PID-3, TOFU-6 and ERH-2  
229 strongly enriched in the IPs of one another, suggests that it can.

230

### 231 **PETISCO subunits are required for 21U RNA biogenesis and are essential for** 232 **embryogenesis**

233 Since at least two components of PETISCO, PID-1 and TOFU-6, play a major role in 21U RNA  
234 biogenesis, we hypothesized that the other components are also part of this pathway. We  
235 first tested whether they affect the silencing of a GFP sensor construct that reports on the  
236 activity of the 21U pathway (21U sensor)<sup>11</sup>. We used a strain that contains this sensor plus a  
237 *pid-1(xf14)* mutation that is rescued by transgenic expression of PID-1. In this strain, the  
238 sensor is silenced (Figure 4a,b), although not completely. This partial 21U sensor-silencing  
239 brings two advantages: first, the 21U sensor is not in an RNAe-state, in which it would no  
240 longer be activated by loss of 21U RNAs; second, a semi-silenced state allows for scoring of  
241 both increased and decreased sensor activity.

242

243 Animals from this sensitized sensor strain were subjected to RNAi targeting the various  
244 PETISCO subunits and sensor activity was evaluated by microscopy and RT-qPCR (Figure  
245 4a,b). As expected, RNAi against *pid-1* activated the sensor. Likewise, RNAi against *ife-3*, *pid-*

246 *3*, *tofu-6* and *erh-2* activated the sensor. These data show that PETISCO subunits, like the  
247 PETISCO interactor PID-1, are required for a fully functional 21U RNA silencing pathway.

248

249 To extend the above observation to the overall 21U RNA population, we aimed to sequence  
250 small RNAs from genetic mutants. For this, we created mutant alleles using CRISPR-Cas9 for  
251 each of the PETISCO subunit genes. We were able to derive deletion alleles for *pid-3*, *erh-2*  
252 and *ife-3* (Figure S5a), and isolated and sequenced small RNAs. We did not make mutants for  
253 *tofu-6*, since RNAi on *tofu-6* was already shown to significantly reduce 21U RNA production  
254 <sup>27</sup>. All experiments were done in triplicates. The results show that all tested PETISCO  
255 subunits significantly affect 21U RNA biogenesis (Figure 4c). In particular, *pid-3(tm2417)* and  
256 *erh-2(xf168)* mutants display a strong reduction in 21U RNA levels. The effect of *ife-3(xf102)*  
257 mutation on 21U RNA accumulation is less pronounced, but still significant. Redundancy  
258 between IFE-3 and other eIF4E homologs, could be a reason for this less pronounced effect  
259 on 21U RNA levels, as we find IFE-1, a non-selective TMG/m7G binder <sup>34</sup>, enriched in some of  
260 our IP-MS experiments (Figure 2a-c, S3b). Other types of small RNAs, such as 22G, 26G and  
261 miRNAs were mostly not affected by the tested mutations (Figure 4c and S5b-d). We note  
262 that so-called type II 21U RNAs, which come from loci lacking the canonical Ruby motif and  
263 are expressed at much lower levels <sup>25</sup>, are only mildly, or not at all affected by loss of  
264 PETISCO components.

265

266 Besides the defects in 21U biogenesis, the mutant alleles also display a so-called maternal  
267 effect lethal (Mel) phenotype: homozygous mutant offspring from a heterozygous animal  
268 develop into fertile adults, but the embryos display a fully penetrant arrest and never hatch  
269 (Table 1). This phenotype has already been described for *tofu-6*, which is also known as *mel-*  
270 *47* <sup>41</sup>. The *ife-3* mutant displays a mixed phenotype, as previously described <sup>42</sup>: homozygous  
271 mutant offspring from a heterozygous animal develop into adults that can either display a  
272 masculinized germline (Mog) or a Mel phenotype. Interestingly, we note that *pid-1* mutants  
273 also display a Mog phenotype, albeit at low frequency (Table 1 and Figure S6).

274

### 275 **PID-1 and TOST-1 define distinct functions of PETISCO**

276 The fact that PETISCO genes are essential for embryogenesis contrasts with the fact that loss  
277 of 21U RNAs through other means, such as loss of PRG-1 or PID-1, does not result in a Mel

278 phenotype. Interestingly, RNAi-knockdown of *tost-1* resulted in an embryonic lethal  
279 phenotype (not shown). In our IP-MS experiments, we consistently found this protein to  
280 interact with the PETISCO subunits (Figure 2a-d), yet not with PID-1 (Figure 1a and S1a).  
281 Furthermore, *tost-1(rnai)* displays enhanced, rather than disrupted silencing of the  
282 sensitized 21U sensor (Figure 4a,b). This phenotype lead us to name this protein TOST-1,  
283 short for twenty-one U antagonist.

284

285 We tested both PID-1 and TOST-1 for interactions with PETISCO subunits. We found that  
286 both PID-1 and TOST-1 specifically interact only with ERH-2 (Figure 3a). While the overall  
287 amino-acid sequences of PID-1 and TOST-1 do not display convincing homology (Figure S7a),  
288 when aligned with PID-1 and TOST-1 homologs from other nematode species, a conserved  
289 motif emerges ( $_{[+][+]\Psi(T/S)}L_{(N/S)[-]}RF_{x\Psi xxx}G_{(Y/F)}$  – Figure 5a). Strikingly, the *xf14* allele we  
290 identified for *pid-1* in our previously described genetic screen carries a mutation of the fully  
291 conserved arginine residue within this motif (R61C)<sup>26</sup>. When introduced into the Y2H  
292 experiment, PID-1(R61C) did not interact with ERH-2, and the analogous mutation in TOST-1  
293 also disrupted its ERH-2 interaction (Figure 5b). These data strongly suggest that both PID-1  
294 and TOST-1 share a conserved short motif required for ERH-2 interaction.

295

296 To further understand TOST-1 function we generated loss of function alleles for *tost-1* using  
297 CRISPR-Cas9 (Figure S5a). Loss of TOST-1 did not significantly affect 21U RNA biogenesis  
298 (Figure 5c, S7b), but did result in a fully penetrant Mel phenotype (Table 1). Among the  
299 alleles we generated, we found one allele, *tost-1(xf196)*, with a 58bp deletion which  
300 removes the splice acceptor site of its third exon (Figure S5a), resulting in either a frame-  
301 shift or a C-terminal truncation. *tost-1(xf196)* displays a temperature-sensitive (TS) effect: at  
302 25°C the animals are fully Mel, while at 15°C the animals are viable. The fact that this allele  
303 appears to be mostly functional at 15°C suggests that the N-terminal part of TOST-1 is the  
304 critical part of this protein. The interaction motif we identified is still intact in *tost-1(xf196)*,  
305 consistent with the idea that it is essential for TOST-1 function. This TS allele allowed us to  
306 probe the Mel phenotype in more detail, through temperature-shift experiments (Figure  
307 S7c). First, animals grown at the restrictive temperature were able to produce viable  
308 offspring after shifting them to the permissive temperature. This shows that there are no  
309 structural or developmental defects in the germline of these animals that prevent them from

310 producing live offspring. Second, the TS allele allows us to probe when TOST-1 function is  
311 required. The time required for animals shifted to the permissive temperature to produce  
312 viable embryos (8 hours) is significantly longer than the time it takes from fertilization to  
313 egg-laying (approximately 200 min at 15°C), implying that the embryos laid after 8 hours  
314 were fertilized and raised at the permissive temperature. Yet, they are still arresting. This  
315 observation places TOST-1 activity within the gonad. However, when animals are shifted  
316 from permissive to restrictive temperature, the first arrested embryos are laid already after  
317 two hours. This is very close to the time of residency within the uterus (approximately 150  
318 min 25°C), and hence these embryos had been fertilized very close to the time of the  
319 temperature shift, in a gonad that was still functional. This suggests TOST-1 also has a  
320 function within the embryo. This is consistent with PETISCO subunit expression within early  
321 embryos (Figure S2c).

322

323 In conclusion, our data shows that both TOST-1 and PID-1 bind to the same PETISCO subunit,  
324 while loss of these two proteins results in different phenotypes. The combined phenotypes  
325 of both *pid-1* and *tost-1* mutants is found in mutants for the other PETISCO subunits,  
326 strongly suggesting that PID-1 and TOST-1 define two distinct aspects of PETISCO function.

327

### 328 **PETISCO interacts with SL1 RNA**

329 Given the known links between the 21U RNA pathway and snRNA transcription, the fact that  
330 we find many SMN-complex components in IFE-3 IPs, and that at least one SMN component  
331 has a Mel phenotype (MEL-46), we hypothesized that the essential function of PETISCO is  
332 linked to snRNA homeostasis. Consistent with this idea, we noticed a striking accumulation  
333 of a 3' fragment of SL1 RNA in a number of the mutants we tested (Figure 6a,b, S8a). Such  
334 accumulation was less pronounced, or absent for another small non-coding RNA that is  
335 produced from the same gene cluster as SL1, 5S rRNA (Figure 6b,c). Importantly, this  
336 enrichment of SL1 fragments was very clear in *tost-1* mutants, but absent in *pid-1* mutants.  
337 Also *ife-3* mutants and *erh-2* mutants displayed a similar accumulation in all the replicates  
338 that we sequenced. Mutants for *pid-3*, however, did not show the accumulation (Figure 6b).  
339 For SL2 we only observe the enrichment in *ife-3* mutant libraries (Figure S8b), but we point  
340 out that SL2 read counts are comparatively very low.

341

342 To further test a potential link between PETISCO and SL1 RNA, we probed whether SL1, or  
343 SL1 fragments may be bound by PETISCO. To test this, we performed RIPseq experiments on  
344 IFE-3 and PID-3. We performed these experiments in quadruplicate, and also performed  
345 triplicate mock IPs from wild-type animals. Since full SL1 transcripts, but also 21U precursors  
346 are capped, we treated the RNA with RppH to remove 5' caps before cloning. We detect  
347 strong and significant enrichment of SL1, and to a lesser extent SL2 sequences in both PID-3  
348 and IFE-3 IPs (Figure 6c, S8c). In contrast, transcripts from 21U loci, 5S rRNA and snRNAs are  
349 not enriched, or are even depleted (Figure 6c, S8c). The read coverage over the SL1  
350 transcript shows that two fragments are detected: one at the 5' and another at the 3' end  
351 (Figure 6d, S8d). The 5' fragment is capped, as this fragment is absent from libraries from  
352 non-RppH treated RNA (Figure 6d). We conclude that PETISCO binds to SL1 RNA and that loss  
353 of PETISCO leads to an accumulation of SL1 RNA fragments.

## 354 Discussion

355 We have identified a protein complex, named PETISCO, that is involved in at least two  
356 different pathways. PID-1 guides PETISCO towards 21U RNA biogenesis, whereas TOST-1  
357 brings PETISCO to a pathway that is essential for embryogenesis, but does not involve 21U  
358 RNAs. Here we discuss various aspects of this complex and present hypotheses for the  
359 different potential functions of PETISCO.

360

### 361 PID-3 and TOFU-6 define the core of PETISCO

362 Judging by the enrichments found in all IPs and the similarities in phenotypes of the  
363 corresponding mutants it seems likely that two proteins, PID-3 and TOFU-6 form the core of  
364 the PETISCO complex, and that the other identified factors may add as adaptors for specific  
365 functions of PETISCO. What could the core function(s) of this complex be? Based on protein  
366 identities and obtained results we consider the following, non-exclusive possibilities.

367

368 Based on the presence of two RRM domains, one in TOFU-6 and one in PID-3, this complex  
369 likely has RNA binding activities. Indeed, our RIPseq experiment identified 3' fragments of  
370 SL1 and SL2 bound to PETISCO. Interestingly, we found that both RRM domains act as  
371 protein-protein interaction modules. This does not mean that these two RRM domains  
372 cannot also be involved in RNA binding, as combined RNA- and protein-binding activities for  
373 RRM domains have been described before<sup>43</sup>. Possibly, the assembly of the RRM-RRM  
374 contact between PID-3 and TOFU-6 is facilitated by RNA. Even though we find that RNase  
375 treatment does not affect the pull-down efficiency between PID-3 and TOFU-6, the RNA  
376 involved may be inaccessible to RNases.

377

378 In addition to the RRM motifs, the MID-domain present in PID-3 also brings potential for  
379 protein-RNA-interactions. The MID-domain has thus far been described in context of  
380 argonaute proteins where it mediates interactions with the 5' end of the bound small RNA  
381 co-factor<sup>44</sup>. It is curious to find such a domain in a protein involved in generating small RNA  
382 co-factors for an argonaute protein. We hypothesize that the MID domain of PID-3 may help  
383 to stabilize a 5' processing intermediate. This would imply PETISCO as a 5' end processing  
384 platform for 21U RNAs. Biochemical reconstitution experiments will be required to test this.

385

386 The Tudor domain of TOFU-6 likely represents a protein-protein interaction unit. Tudor  
387 domains are known to interact with methylated arginines, and within perinuclear granules,  
388 where PETISCO is found, such methylated arginines are likely abundant<sup>45</sup>. Hence, the Tudor  
389 domain may be involved in sequestering PETISCO to these granules, possibly to PRG-1. PRG-  
390 1 itself has an N-terminal protein sequence that is highly suggestive of arginine methylation.  
391 In one of our IFE-3 pull-downs, we do enrich for PRG-1 (Figure 2a), supporting this possibility.  
392

### 393 **ERH-2: Bridge between core-PETISCO and PETISCO-guiding factors?**

394 The presence of ERH-2 provides hints for PETISCO function. In *S. pombe*, Erh1 forms a tight  
395 complex with a protein named Mmi and together they are involved in nuclear mRNA  
396 degradation of meiotic transcripts, involving proteins such as ARS2 and the CCR4-NOT  
397 complex<sup>33</sup>. Hence, Erh1 in *S. pombe* appears to act as a bridge between an RNA binding  
398 protein (Mmi) and an RNA processing machinery. Our data strongly suggest that ERH-2 in *C.*  
399 *elegans* has a very similar function. On the one hand, it binds core PETISCO and on the other  
400 hand either PID-1 or TOST-1, which set the function of the complex (see below).

401  
402 ERH-related proteins in other systems, including *S. pombe* and human cells, are nuclear  
403 proteins<sup>33</sup>, while we find ERH-2 to be present mainly in perinuclear granules. Related to this  
404 it is interesting to note that *C. elegans* has a second ERH-like protein T21C9.4. Alignments  
405 show that this homolog is more closely related to *S. pombe* and human ERH1 (not shown),  
406 raising the possibility that T21C9.4 in *C. elegans* is nuclear and may be coupled to nuclear  
407 RNA processing.

408

### 409 **Bi-functionalization of PETISCO through PID-1 and TOST-1**

410 We show that PETISCO has at least two functions: 21U RNA biogenesis and another,  
411 essential function in embryogenesis, which is likely related to SL1/2 snRNP homeostasis.  
412 These two functions can be functionally separated through two different 'adapter'-proteins  
413 (PID-1 and TOST-1) that bind to PETISCO via ERH-2. The overall homology between PID-1 and  
414 TOST-1 is very low. Nevertheless, we identified a motif that is required for binding to ERH-2.  
415 Hence, both proteins likely bind to PETISCO in a mutually exclusive way. Indeed, no TOST-1  
416 was detected in PID-1 IPs, and Zeng et al. (accompanying manuscript) did not find PID-1 in  
417 their TOST-1 IPs. An IP-MS experiment on PID-3 in absence of PID-1 (therefore enriching for

418 TOST-1:PETISCO) did not reveal much change compared to wild-type (not shown), suggesting  
419 that stable interactions within PID-1:PETISCO and TOST-1:PETISCO are very similar and do  
420 not provide further insights into the differential activities of PID-1 and TOST-1.

421

### 422 **Potential roles for IFE-3**

423 IFE-3 has been shown to bind m7G Cap structures, and to bind much less efficiently to the  
424 typical TMG Cap structures found on the majority of trans-spliced mRNAs in *C. elegans*<sup>34</sup>.  
425 This activity of IFE-3 makes it a good candidate for binding 21U RNA precursors at a stage  
426 before 5' processing. IFE-3 IP-MS experiments also enrich mildly for proteins involved in de-  
427 capping (e.g. EDC-3, CAR-1, CGH-1 – Figure 2a). In relation to 21U RNA biogenesis, it is an  
428 intriguing option that IFE-3 binds 21U precursor transcripts through their 5' cap structure,  
429 after which they become de-capped by associated de-capping activities. IFE-3, however, is  
430 not essential for 21U generation. This could be due to either functional redundancy with IFE-  
431 1, which we regularly detect in our IP-MS experiments. Alternatively, IFE-3 has no direct role  
432 in 21U RNA processing, and the small drop of 21U levels in *ife-3* mutants is an indirect effect,  
433 for instance through effects on PETISCO overall stability.

434

435 We find that IFE-3 consistently comes down with many, if not all proteins found in the so-  
436 called SMN complex. This complex is well known for its involvement in snRNP assembly<sup>38</sup>. In  
437 *C. elegans*, the SMN complex has also been shown to be required for SL1 trans-splicing<sup>46</sup>.  
438 We note that a homolog for Gemin5, which has been shown to bind the m7G Cap structure  
439 of pre-mature snRNAs in human cells<sup>47</sup>, is not encoded by the *C. elegans* genome. Given the  
440 cap-binding activity of IFE-3 and its association with the other SMN complex subunits, IFE-3  
441 may fulfil this function in *C. elegans*. We note that like loss of IFE-3<sup>42</sup>, loss of the *C. elegans*  
442 Gemin3 homolog, named MEL-46<sup>41</sup>, and the U2 snRNP-associated factor MOG-2<sup>48</sup> also  
443 result in Maternal effect lethality (Mel) and Masculinization of the germline (Mog)  
444 phenotypes, further strengthening the links between IFE-3 and snRNP homeostasis. Given  
445 that the SMN-complex proteins are not found in the IPs of any of the other PETISCO  
446 subunits, the IFE-3-SMN interaction is likely to be physically separated from PETISCO. Finally,  
447 it is interesting to note that *pid-1* mutants, but not *tost-1* mutants, also display a Mog  
448 phenotype, albeit at a low frequency. Considering the interplay between PID-1 and TOST-1,



449 this could relate from excessive, or ectopic TOST-1:PETISCO in *pid-1* mutants affecting the  
450 IFE-3-SMN interplay.

451

#### 452 **Potential mechanisms behind the Mel and 21U phenotypes of PETISCO mutants**

453 Our data clearly show that PETISCO has at least two functions. Its role in 21U RNA biogenesis  
454 is non-essential and is guided by PID-1. A second function, which is essential for early  
455 development, is linked to PETISCO via TOST-1. While our current data do not provide  
456 mechanistic details on molecular PETISCO function, they do provide interesting leads as to  
457 what the essential function of PETISCO may be.

458

459 As mentioned above, PETISCO contains proteins with domains that interact with the 5' ends  
460 of RNA, either capped or phosphorylated, raising the possibility PID-1-bound PETISCO plays a  
461 role in 5' end processing of 21U precursor transcripts. In our RIP experiments, we did not  
462 detect 21U RNA precursor molecules, suggesting that either levels are too low to be  
463 detected in a RIP experiment, or that their processing is too fast. Given that RIP experiments  
464 typically have high backgrounds, this may easily prevent detection of significant  
465 enrichments. In view of the phenotypes and protein domains within PETISCO, we consider it  
466 very likely that PETISCO does interact with 21U RNA precursors.

467

468 But what could the molecular function of PID-1-bound PETISCO be? In absence of PETISCO  
469 21U RNA levels drop strongly, but we note that so-called type II 21U RNA levels are much  
470 less affected (Figure S5b). These 21U RNA species do not derive from loci with the typical  
471 Ruby-motif, and are expressed at much lower levels than type I 21U RNAs. We hypothesize  
472 that PETISCO may function to specifically stimulate the processing of pre-cursors that come  
473 from Ruby-motif-containing 21U loci, such that the PRG-1 RNP pool is dominated by PRG-1  
474 protein bound to type I 21U RNAs.

475

476 TOST-1-bound PETISCO may have a similar function, only then coupled to the production of  
477 an RNP that is essential for early development. Our RIPseq and mutant small RNAseq data  
478 indicate that this could involve the SL1 snRNP. Our interpretation of these data is that  
479 PETISCO binds full-length SL1 transcripts, but that these are partially degraded by nucleases  
480 during the RIP-procedure, or within the animals when further processing of the complex is

481 stalled due to loss of PETISCO subunits such as TOST-1 or IFE-3. But how would this explain  
482 the maternal effect lethality phenotype of PETISCO mutants? SL1 is a generally required  
483 splice-leader RNA, and mutants that carry a large deletion covering the SL1 loci display a  
484 direct embryonic lethal phenotype<sup>49</sup>. If PETISCO would have a core function in trans-splicing  
485 one would expect a similarly severe zygotic phenotype. We hypothesize that PETISCO  
486 specifically helps the accumulation of a large pool of SL1 snRNPs that will be maternally  
487 loaded into the embryos. Later in development, when the demand for SL1 snRNPs may have  
488 dropped, PETISCO may therefore not be required. This would create an interesting parallel  
489 to 21U RNPs, that are also provided maternally<sup>15</sup>.

490

491 Clearly, additional studies will be required to resolve the molecular function of PETISCO in  
492 21U RNA processing and further test its role in SL1 homeostasis during early development.  
493 However, our data firmly show that PETISCO is a 21U biogenesis complex, and in addition  
494 has an essential role during early development. Our work shows that the processing of 21U  
495 RNAs is likely derived from a much more widely conserved mechanism, and provides a new  
496 and exciting view into how small RNA biogenesis can be intertwined with other gene-  
497 regulatory mechanisms.

498

#### 499 **Acknowledgements**

500 We thank all the members of the Ulrich and Ketting lab for great help and discussion. A  
501 special thanks to the Yasmin El Sherif and Sonja Braun for technical assistance. We thank  
502 Miguel Andrade, Peter Sarkies and Ian MacRae for helpful discussions. The authors are  
503 grateful to Hanna Lukas, Clara Werner and Maria Mendez-Lago of the IMB genomics core  
504 facility for library preparation. We thank the IMB Media Lab, Microscopy and Cytometry  
505 Core Facilities for consumables and equipment. Some strains were provided by  
506 the *Caenorhabditis* Genetics Center (CGC), which is funded by NIH Office of Research  
507 Infrastructure Programs (P40 OD010440) and the National BioResource Project, managed by  
508 the Mitani Lab. This work was supported by Deutsche Forschungsgemeinschaft grant KE  
509 1888/1-1 and KE1888/1-2 (Project Funding Programme to R.F.K.), ERC-StG 202819 (RFK) and  
510 ERC-AdG 323179 (HDU).

511

512

## 513 Figure Legends

514

### 515 Figure 1 – PID-1 interactors reside in P-Granules

516 a) Volcano plot representing label-free proteomic quantification of PID-1 IPs from non-  
517 gravid adult extracts. IPs were performed and analyzed in quadruplicates. The x-axis  
518 represents the median fold enrichment of individual proteins in wild type (WT) versus  
519 *pid-1(xf14)* mutant strain. y-axis indicates  $-\text{Log}_{10}(\text{p-value})$  of observed enrichments.  
520 Dashed lines represent thresholds at  $\text{p}=0.05$  and 2-fold enrichment. Blue data points  
521 represent values out of scale. Red and Green data points represent values above and  
522 below threshold, respectively.

523 b and c) Expression pattern and localization of tagged PETISCO components and P-  
524 granule marker PGL-1. Endogenous promoters and 3'UTRs were used for PETISCO  
525 proteins. Proteins and observable tags indicated in the panels. b) Immunostaining  
526 images acquired with laser scanning confocal microscope. c) Live worm images  
527 acquired under wide field fluorescent microscope. Scale bars represent 5  $\mu\text{m}$ .  
528 Contrast of images has been enhanced.

529

### 530 Figure 2 – PID-1 interactors form a novel protein complex, PETISCO

531 a-d) Volcano plot representing label-free proteomic quantification of quadruplicate a)  
532 3xFLAG::mCherry::IFE-3;*ife-3(xf101)*; b) PID-3::mCherry::Myc;*pid-3(tm2417)*; c) TOFU-  
533 6::GFP::HA;*tofu-6(it20)* and d) ERH-2::GFP::OLLAS;*erh-2(xf168)* IPs from non-gravid  
534 adult extracts. The x-axis represents the median fold enrichment of individual  
535 proteins in control (WT) versus transgenic strain. y-axis indicates  $-\text{Log}_{10}(\text{p-value})$  of  
536 observed enrichments. Dashed lines represent thresholds at  $\text{p}=0.05$  and 2-fold  
537 enrichment. Blue data points represent values out of scale. Red and Green data  
538 points represent above and below threshold respectively.

539 e) Venn Diagram summarizing significant interactions in PETISCO protein IPs.  
540 \*represents protein found significantly enriched in only one experiment of  
541 3xFLAG::mCherry::IFE-3;*ife-3(xf101)* IP.

542

### 543 Figure 3 – PETISCO Architecture

544 a-d) Yeast two-hybrid interaction assays of PETISCO subunits in low (TRP<sup>-</sup>LEU<sup>-</sup>HIS<sup>-</sup>) or high  
545 stringency media (TRP<sup>-</sup>LEU<sup>-</sup>HIS<sup>-</sup>ADE<sup>+</sup>) as indicated. Interactions were screened in  
546 both Y2H orientations. a) Full length proteins b) TOFU-6 and individual domains  
547 tested for interaction with full length IFE-3 c) Interactions between PID-3 and TOFU-  
548 6 d) Interaction between PID-3 and ERH-1. For details on domains and other  
549 selection conditions see Figure S4.

550

### 551 Figure 4 – PETISCO is required for 21U RNA biogenesis

552 a) Wide field fluorescent microscopy of adult hermaphrodites carrying GFPH2B-21U  
553 sensor transgene in a sensitized background. Worms were subjected to RNAi via  
554 feeding (targets indicated in figure) from L1 larval stage to adulthood. Empty RNAi  
555 Vector serves as negative control. Scale Bar 10  $\mu\text{m}$ .

556 b) Quantitative RT-PCR of 21U sensor transgene in adult worm populations of A). Values  
557 are obtained from experimental triplicates and technical duplicates, normalized to

558 *pmp-3* mRNA levels. Significance was tested with Student's t-test: \*\*p-value<0.01;  
559 \*p-value<0.05. Error bars represent standard deviation.

560 c) Global level of type I 21U RNA and miRNAs in the indicated strains. Values are in  
561 reads per million (RPM). Individual data points of three independent replicates are  
562 shown and horizontal bar represents the mean. Significance was tested with  
563 Student's t-test and p-values are indicated in the graph.

564

#### 565 **Figure 5 – TOST-1 is essential but not required for 21U RNA biogenesis**

566 a) Alignment of a short region of PID-1 and TOST-1 homologs from different nematodes.  
567 Conserved arginine residue was found to be mutated in *pid-1(xf14)* as indicated.  
568 Consensus sequence is presented below alignment. Alignment performed with  
569 MUSCLE v3.8<sup>50</sup> and representation with ESPrit v3.0<sup>51</sup>.

570 b) Y2H interaction assay of PID-1, TOST-1 and PID-1/TOST-1 carrying the corresponding  
571 arginine mutation found in *pid-1(xf14)*. High stringency plates (TRP<sup>-</sup>LEU<sup>-</sup>HIS<sup>-</sup>ADE<sup>-</sup>)  
572 were used in the presented figure. For other conditions please see Figure S4d.

573 c) Global levels of type I 21U RNA and miRNAs in wild type (N2), *pid-1(xf35)* and *tost-1(xf194)*  
574 gravid adult worms. Values are in reads per million (RPM). Individual data  
575 points of three independent replicates are shown and horizontal bar represents the  
576 mean. Significance was tested with Student's t-test and p-values are indicated in the  
577 graph.

578

#### 579 **Figure 6 – PETISCO interacts with SL1 snRNA**

580 a) Schematic representation of the Splicing Leader 1 RNA.

581 b) Global levels of SL1 RNA and 5S rRNA in wild type (N2), *pid-1(xf35)* and *tost-1(xf194)*  
582 gravid adult worms and *pid-3(tm2417)*, *erh-2(xf168)* and *ife-3(xf102)* non-gravid  
583 adults. Values are in reads per million (RPM). Individual data points of three  
584 independent replicates are shown and horizontal bar represents the total mean.  
585 Significance was tested with Student's t-test and p-values are indicated in the graph.

586 c) Fold enrichments of SL1 RNA and 5S rRNA in Mock (N2), 3xFLAG::mCherry::IFE-3;*ife-3(xf101)*;  
587 and PID-3::mCherry::Myc;*pid-3(tm2417)* RIPs over paired inputs in non-  
588 gravid adult worms. Top row displays non-treated and bottom row RppH treated  
589 samples. Individual data points of three independent replicates are shown and  
590 horizontal bar represents the mean. Significance was tested with Student's t-test and  
591 p-values are indicated in the graph.

592 d) Coverage profile, normalized to paired input, of SL1, of the data displayed in c. Colors  
593 under SL1 RNA correspond to scaled colors represented in a.

594

#### 595 **Figure 7 – Schematic representation of PETISCO function**

596 A schematic of the proposed PETISCO activity, displaying its dual function. One in 21U  
597 biogenesis and another potentially linking to splice leader homeostasis. The two different 5'  
598 end binding domains may reflect stabilization of different RNA species, and may reflect 5'  
599 end processing of transcripts bound by PETISCO. ERH-2 serves as an anchor for PID-1 or

600 TOST-1 driving PETISCO function towards 21U RNA biogenesis or SL1 homeostasis  
601 respectively.

602

603 **Table 1 – PETISCO displays maternal effect lethality**

604 “n.a.” not applicable; “n.d.” not determined; “-“ mild 21U RNA defect; “--“ severe 21U RNA  
605 defect; “+” no 21U RNA defect; “(TS)” temperature sensitive; “#” counts are for gonadal  
606 arms (n=38) due to mixed phenotypes in individuals; “\*” according to Goh *et al.*<sup>27</sup>.

607

## 608 References

- 609 1. Ketting, R.F. The many faces of RNAi. *Dev Cell* **20**, 148-61 (2011).
- 610 2. Weick, E.M. & Miska, E.A. piRNAs: from biogenesis to function. *Development* **141**,  
611 3458-71 (2014).
- 612 3. Luteijn, M.J. & Ketting, R.F. PIWI-interacting RNAs: from generation to  
613 transgenerational epigenetics. *Nat Rev Genet* **14**, 523-34 (2013).
- 614 4. Czech, B. & Hannon, G.J. One Loop to Rule Them All: The Ping-Pong Cycle and piRNA-  
615 Guided Silencing. *Trends Biochem Sci* **41**, 324-337 (2016).
- 616 5. Luteijn, M.J. et al. Extremely stable Piwi-induced gene silencing in *Caenorhabditis*  
617 *elegans*. *EMBO J* **31**, 3422-30 (2012).
- 618 6. Sakakibara, K. & Siomi, M.C. The PIWI-Interacting RNA Molecular Pathway: Insights  
619 From Cultured Silkworm Germline Cells. *Bioessays* **40**(2018).
- 620 7. Rojas-Rios, P. & Simonelig, M. piRNAs and PIWI proteins: regulators of gene  
621 expression in development and stem cells. *Development* **145**(2018).
- 622 8. Das, P.P. et al. Piwi and piRNAs act upstream of an endogenous siRNA pathway to  
623 suppress Tc3 transposon mobility in the *Caenorhabditis elegans* germline. *Mol Cell*  
624 **31**, 79-90 (2008).
- 625 9. Batista, P.J. et al. PRG-1 and 21U-RNAs interact to form the piRNA complex required  
626 for fertility in *C. elegans*. *Mol Cell* **31**, 67-78 (2008).
- 627 10. Wang, G. & Reinke, V. A *C. elegans* Piwi, PRG-1, regulates 21U-RNAs during  
628 spermatogenesis. *Curr Biol* **18**, 861-7 (2008).
- 629 11. Bagijn, M.P. et al. Function, targets, and evolution of *Caenorhabditis elegans* piRNAs.  
630 *Science* **337**, 574-578 (2012).
- 631 12. Lee, H.C. et al. *C. elegans* piRNAs mediate the genome-wide surveillance of germline  
632 transcripts. *Cell* **150**, 78-87 (2012).
- 633 13. Simon, M. et al. Reduced insulin/IGF-1 signaling restores germ cell immortality to  
634 *Caenorhabditis elegans* Piwi mutants. *Cell Rep* **7**, 762-73 (2014).
- 635 14. Heestand, B., Simon, M., Frenk, S., Titov, D. & Ahmed, S. Transgenerational Sterility of  
636 Piwi Mutants Represents a Dynamic Form of Adult Reproductive Diapause. *Cell Rep*  
637 **23**, 156-171 (2018).
- 638 15. de Albuquerque, B.F., Placentino, M. & Ketting, R.F. Maternal piRNAs Are Essential  
639 for Germline Development following De Novo Establishment of Endo-siRNAs in  
640 *Caenorhabditis elegans*. *Dev Cell* **34**, 448-56 (2015).
- 641 16. Phillips, C.M., Brown, K.C., Montgomery, B.E., Ruvkun, G. & Montgomery, T.A. piRNAs  
642 and piRNA-Dependent siRNAs Protect Conserved and Essential *C. elegans* Genes from  
643 Misrouting into the RNAi Pathway. *Dev Cell* **34**, 457-65 (2015).
- 644 17. Ashe, A. et al. piRNAs can trigger a multigenerational epigenetic memory in the  
645 germline of *C. elegans*. *Cell* **150**, 88-99 (2012).
- 646 18. Shirayama, M. et al. piRNAs initiate an epigenetic memory of nonself RNA in the *C.*  
647 *elegans* germline. *Cell* **150**, 65-77 (2012).
- 648 19. Buckley, B.A. et al. A nuclear Argonaute promotes multigenerational epigenetic  
649 inheritance and germline immortality. *Nature* **489**, 447-51 (2012).
- 650 20. Ruby, J.G. et al. Large-scale sequencing reveals 21U-RNAs and additional microRNAs  
651 and endogenous siRNAs in *C. elegans*. *Cell* **127**, 1193-207 (2006).
- 652 21. Kasper, D.M., Wang, G., Gardner, K.E., Johnstone, T.G. & Reinke, V. The *C. elegans*  
653 SNAPc component SNPC-4 coats piRNA domains and is globally required for piRNA  
654 abundance. *Dev Cell* **31**, 145-58 (2014).

- 655 22. Weick, E.M. et al. PRDE-1 is a nuclear factor essential for the biogenesis of Ruby  
656 motif-dependent piRNAs in *C. elegans*. *Genes Dev* **28**, 783-96 (2014).
- 657 23. Beltran, T. et al. Evolutionary analysis implicates RNA polymerase II pausing and  
658 chromatin structure in nematode piRNA biogenesis. *BioRxiv*  
659 <https://doi.org/10.1101/281360> (2018).
- 660 24. Blumenthal, T. Trans-splicing and operons in *C. elegans*. *WormBook*, 1-11 (2012).
- 661 25. Gu, W. et al. CapSeq and CIP-TAP identify Pol II start sites and reveal capped small  
662 RNAs as *C. elegans* piRNA precursors. *Cell* **151**, 1488-500 (2012).
- 663 26. de Albuquerque, B.F. et al. PID-1 is a novel factor that operates during 21U-RNA  
664 biogenesis in *Caenorhabditis elegans*. *Genes Dev* **28**, 683-8 (2014).
- 665 27. Goh, W.S. et al. A genome-wide RNAi screen identifies factors required for distinct  
666 stages of *C. elegans* piRNA biogenesis. *Genes Dev* **28**, 797-807 (2014).
- 667 28. Tang, W., Tu, S., Lee, H.C., Weng, Z. & Mello, C.C. The RNase PARN-1 Trims piRNA 3'  
668 Ends to Promote Transcriptome Surveillance in *C. elegans*. *Cell* **164**, 974-84 (2016).
- 669 29. Kamminga, L.M. et al. Differential impact of the HEN1 homolog HENN-1 on 21U and  
670 26G RNAs in the germline of *Caenorhabditis elegans*. *PLoS Genet* **8**, e1002702 (2012).
- 671 30. Billi, A.C. et al. The *Caenorhabditis elegans* HEN1 ortholog, HENN-1, methylates and  
672 stabilizes select subclasses of germline small RNAs. *PLoS Genet* **8**, e1002617 (2012).
- 673 31. Montgomery, T.A. et al. PIWI associated siRNAs and piRNAs specifically require the  
674 *Caenorhabditis elegans* HEN1 ortholog henn-1. *PLoS Genet* **8**, e1002616 (2012).
- 675 32. Cecere, G., Zheng, G.X., Mansisidor, A.R., Klymko, K.E. & Grishok, A. Promoters  
676 recognized by forkhead proteins exist for individual 21U-RNAs. *Mol Cell* **47**, 734-45  
677 (2012).
- 678 33. Sugiyama, T. et al. Enhancer of Rudimentary Cooperates with Conserved RNA-  
679 Processing Factors to Promote Meiotic mRNA Decay and Facultative  
680 Heterochromatin Assembly. *Mol Cell* **61**, 747-759 (2016).
- 681 34. Jankowska-Anyszka, M. et al. Multiple isoforms of eukaryotic protein synthesis  
682 initiation factor 4E in *Caenorhabditis elegans* can distinguish between mono- and  
683 trimethylated mRNA cap structures. *J Biol Chem* **273**, 10538-42 (1998).
- 684 35. Arai, R. et al. Crystal structure of an enhancer of rudimentary homolog (ERH) at 2.1  
685 Angstroms resolution. *Protein Sci* **14**, 1888-93 (2005).
- 686 36. Frokjaer-Jensen, C. et al. Random and targeted transgene insertion in *Caenorhabditis*  
687 *elegans* using a modified Mos1 transposon. *Nat Methods* **11**, 529-34 (2014).
- 688 37. Sengupta, M.S. et al. ifet-1 is a broad-scale translational repressor required for  
689 normal P granule formation in *C. elegans*. *J Cell Sci* **126**, 850-9 (2013).
- 690 38. Cauchi, R.J. SMN and Gemins: 'we are family' ... or are we?: insights into the  
691 partnership between Gemins and the spinal muscular atrophy disease protein SMN.  
692 *Bioessays* **32**, 1077-89 (2010).
- 693 39. Mader, S., Lee, H., Pause, A. & Sonenberg, N. The translation initiation factor eIF-4E  
694 binds to a common motif shared by the translation factor eIF-4 gamma and the  
695 translational repressors 4E-binding proteins. *Mol Cell Biol* **15**, 4990-7 (1995).
- 696 40. Gruner, S. et al. The Structures of eIF4E-eIF4G Complexes Reveal an Extended  
697 Interface to Regulate Translation Initiation. *Mol Cell* **64**, 467-479 (2016).
- 698 41. Minasaki, R., Puoti, A. & Streit, A. The DEAD-box protein MEL-46 is required in the  
699 germ line of the nematode *Caenorhabditis elegans*. *BMC Dev Biol* **9**, 35 (2009).
- 700 42. Keiper, B.D. et al. Functional characterization of five eIF4E isoforms in *Caenorhabditis*  
701 *elegans*. *J Biol Chem* **275**, 10590-6 (2000).

- 702 43. Maris, C., Dominguez, C. & Allain, F.H. The RNA recognition motif, a plastic RNA-  
703 binding platform to regulate post-transcriptional gene expression. *FEBS J* **272**, 2118-  
704 31 (2005).
- 705 44. Schirle, N.T. & MacRae, I.J. The crystal structure of human Argonaute2. *Science* **336**,  
706 1037-40 (2012).
- 707 45. Siomi, M.C., Mannen, T. & Siomi, H. How does the royal family of Tudor rule the  
708 PIWI-interacting RNA pathway? *Genes Dev* **24**, 636-46 (2010).
- 709 46. Philippe, L. et al. An in vivo genetic screen for genes involved in spliced leader trans-  
710 splicing indicates a crucial role for continuous de novo spliced leader RNP assembly.  
711 *Nucleic Acids Res* **45**, 8474-8483 (2017).
- 712 47. Xu, C. et al. Structural insights into Gemin5-guided selection of pre-snRNAs for snRNP  
713 assembly. *Genes Dev* **30**, 2376-2390 (2016).
- 714 48. Zanetti, S., Meola, M., Bochud, A. & Puoti, A. Role of the *C. elegans* U2 snRNP protein  
715 MOG-2 in sex determination, meiosis, and splice site selection. *Dev Biol* **354**, 232-41  
716 (2011).
- 717 49. Ferguson, K.C., Heid, P.J. & Rothman, J.H. The SL1 trans-spliced leader RNA performs  
718 an essential embryonic function in *Caenorhabditis elegans* that can also be supplied  
719 by SL2 RNA. *Genes Dev* **10**, 1543-56 (1996).
- 720 50. Edgar, R.C. MUSCLE: multiple sequence alignment with high accuracy and high  
721 throughput. *Nucleic Acids Res* **32**, 1792-7 (2004).
- 722 51. Robert, X. & Gouet, P. Deciphering key features in protein structures with the new  
723 ENDscript server. *Nucleic Acids Res* **42**, W320-4 (2014).
- 724



| Gene          | Allele        | Mutation Type    | 21U RNA Presence | Terminal Phenotypes | Ratio (%)  |
|---------------|---------------|------------------|------------------|---------------------|------------|
| <i>ife-3</i>  | <i>xf101</i>  | Start Codon Loss | n.d.             | Mog/Mel             | n.d.       |
|               | <i>xf102</i>  | Frameshift       | -                | Mog/Mel             | n.d.       |
|               | RNAi          | n.a.             | n.d.             | Mog/Mel             | 47/53#     |
| <i>pid-3</i>  | <i>tm2417</i> | Frameshift       | --               | Mel                 | 100        |
|               | <i>xf149</i>  | Frameshift       | n.d.             | Mel                 | 100        |
|               | <i>xf151</i>  | Inframe Deletion | n.d.             | Mel                 | 100        |
|               | <i>xf153</i>  | Frameshift       | n.d.             | Mel                 | 100        |
| <i>tofu-6</i> | <i>it20</i>   | Nonsense         | n.d.             | Mel                 | 100        |
|               | <i>yt2</i>    | Nonsense         | n.d.             | Mel                 | 100        |
|               | RNAi          | n.a.             | --*              | Mel                 | n.d.       |
| <i>tost-1</i> | <i>xf191</i>  | Frameshift       | n.d.             | Viable              | n.d.       |
|               | <i>xf194</i>  | Start Codon Loss | +                | Mel                 | 100        |
|               | <i>xf196</i>  | Splice Site Loss | n.d.             | (TS) Mel            | 100 (25°C) |
| <i>pid-1</i>  | <i>xf14</i>   | Missense         | --               | n.d.                | n.d.       |
|               | <i>xf35</i>   | Frameshift       | --               | Mog                 | <1         |
|               | <i>xf36</i>   | Frameshift       | --               | n.d.                | n.d.       |
| <i>erh-2</i>  | <i>xf168</i>  | Stop Codon Loss  | --               | Mel                 | 100        |

# Figure 1

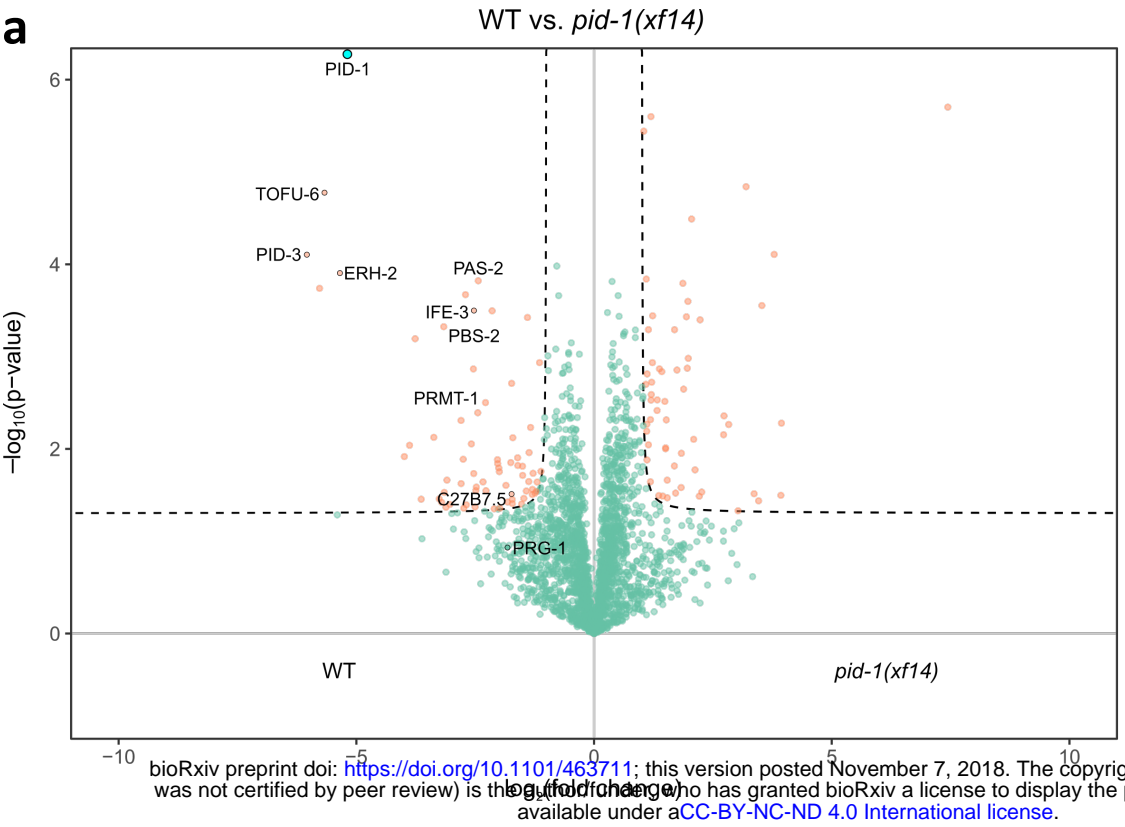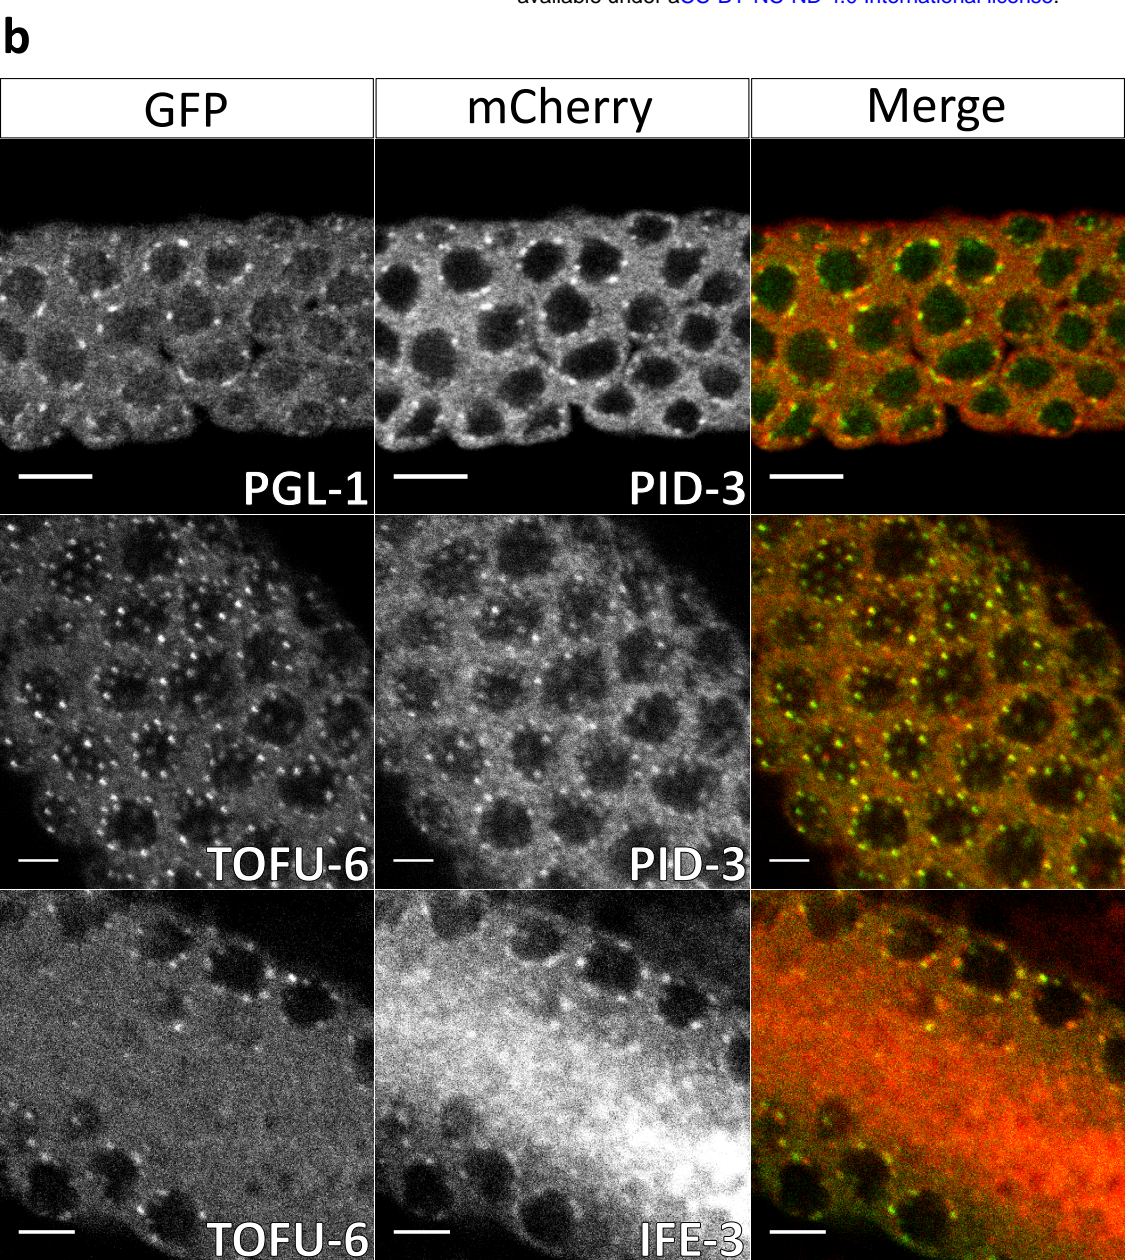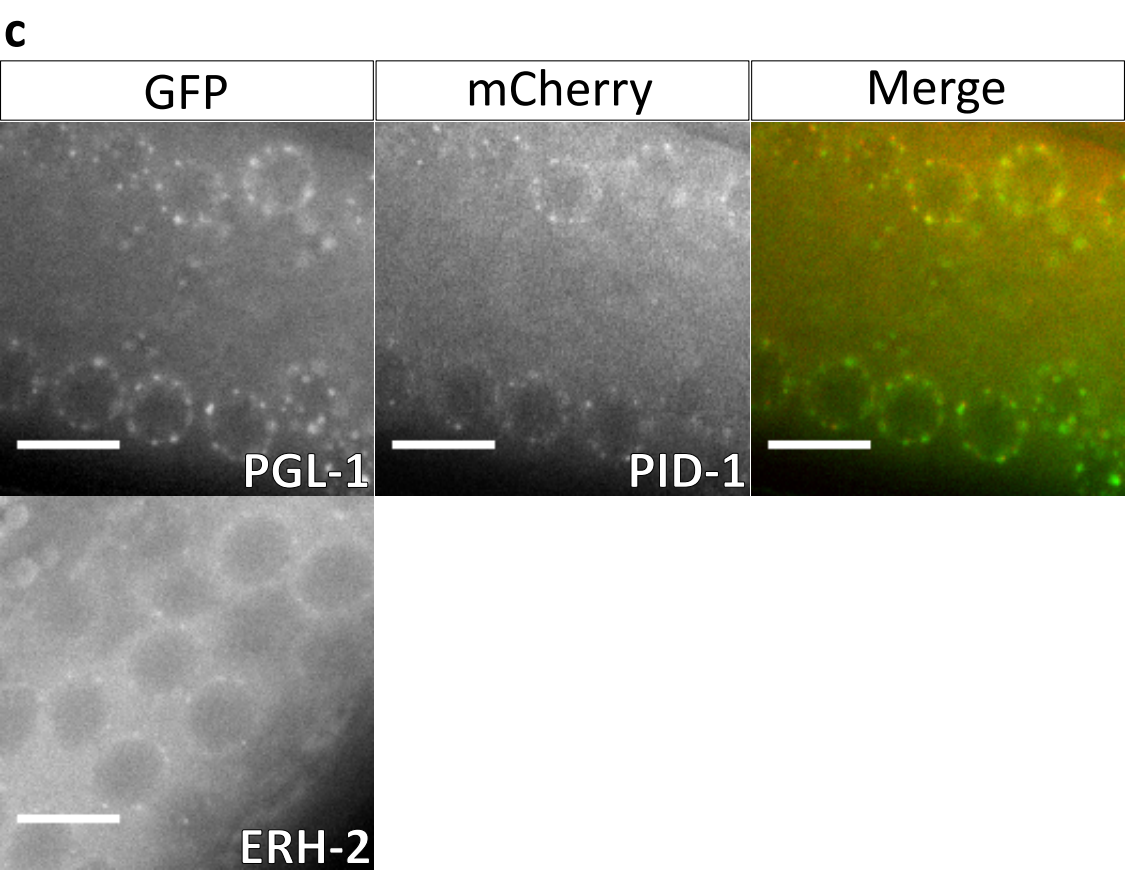

# Figure 2

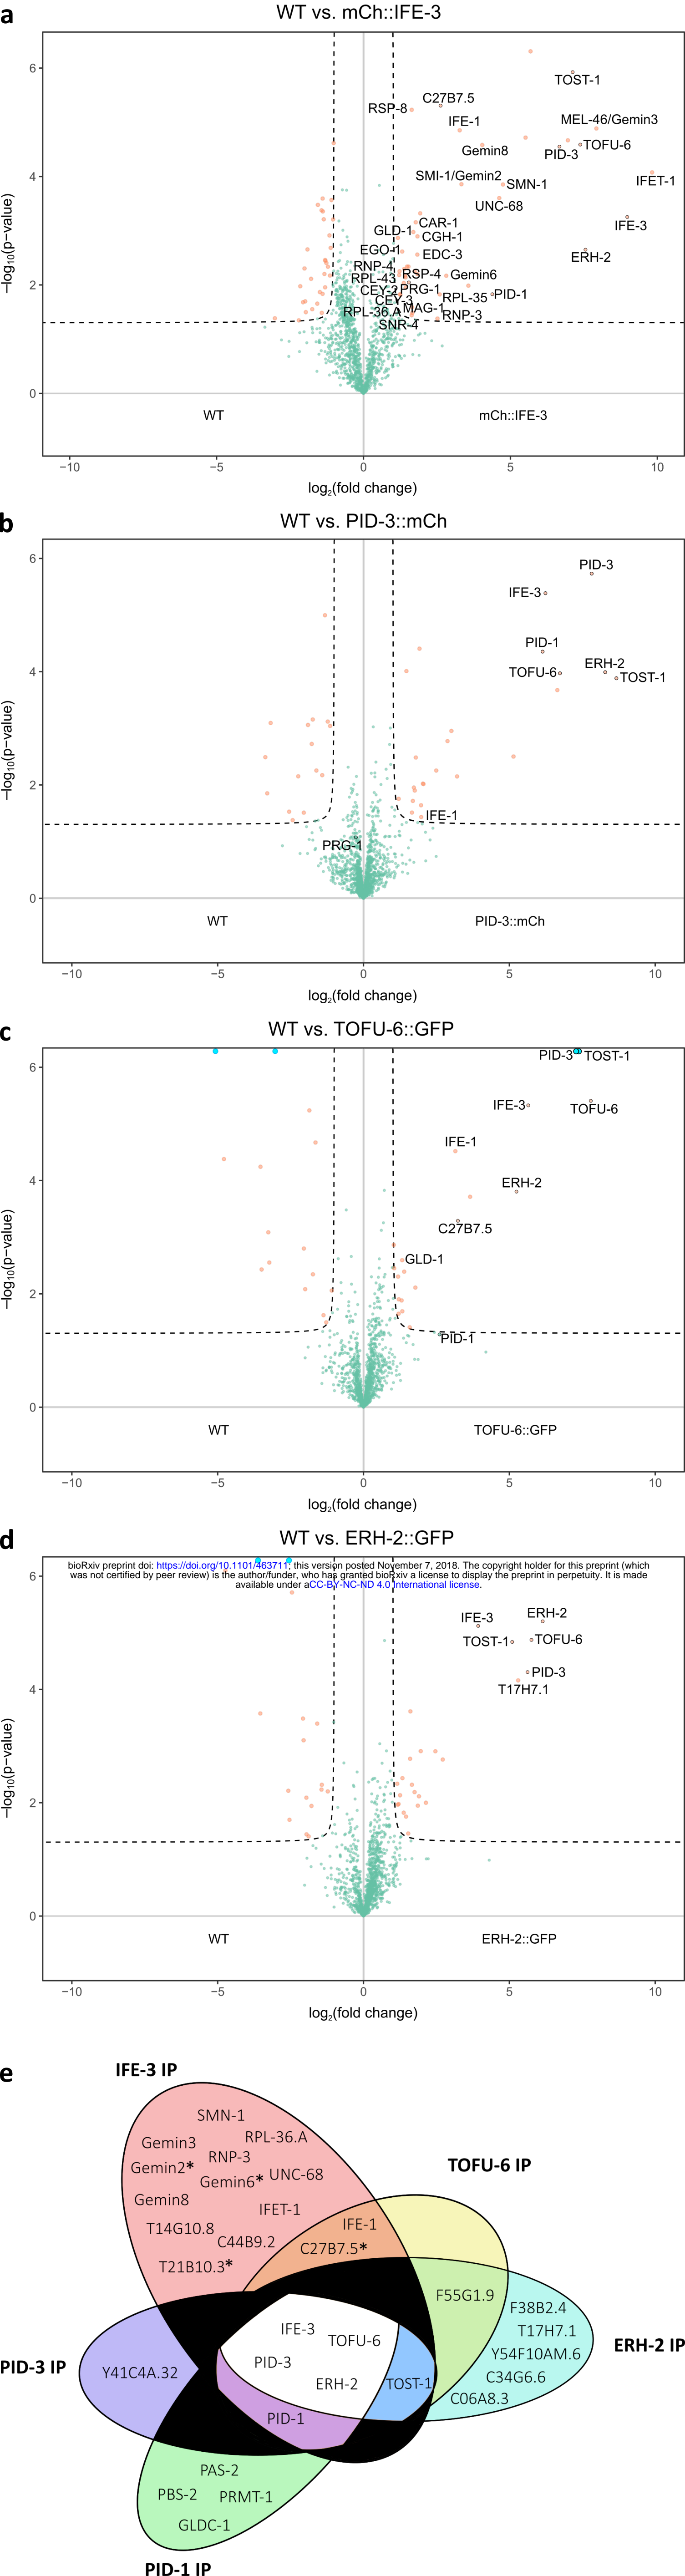

# Figure 3

**a**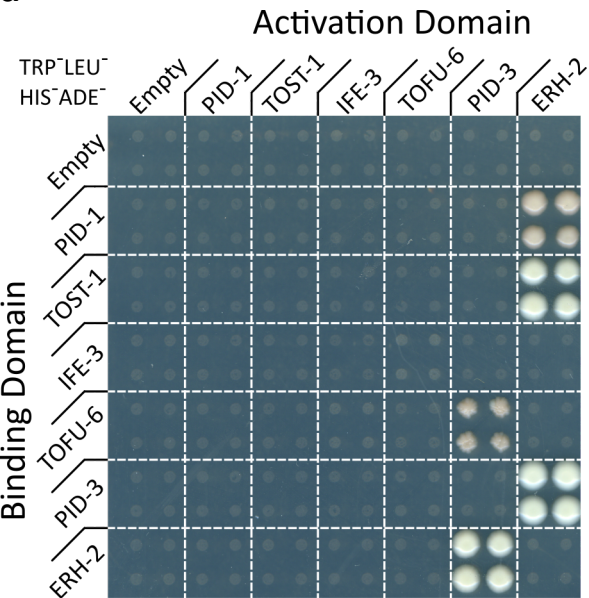**b**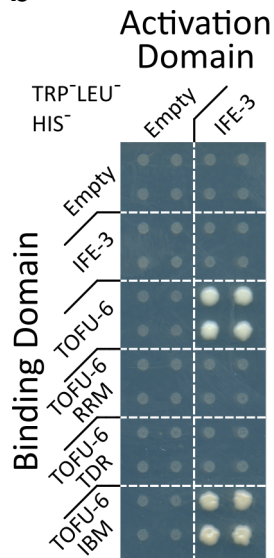**c**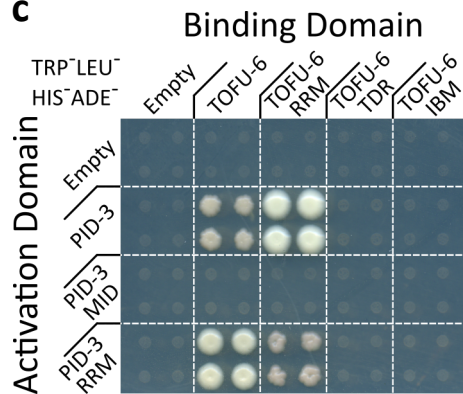**d**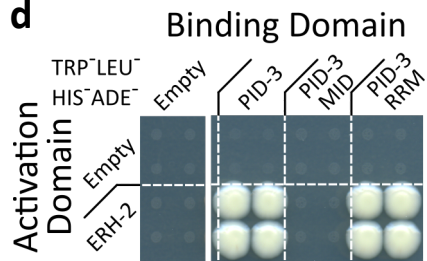

# Figure 4

**a**

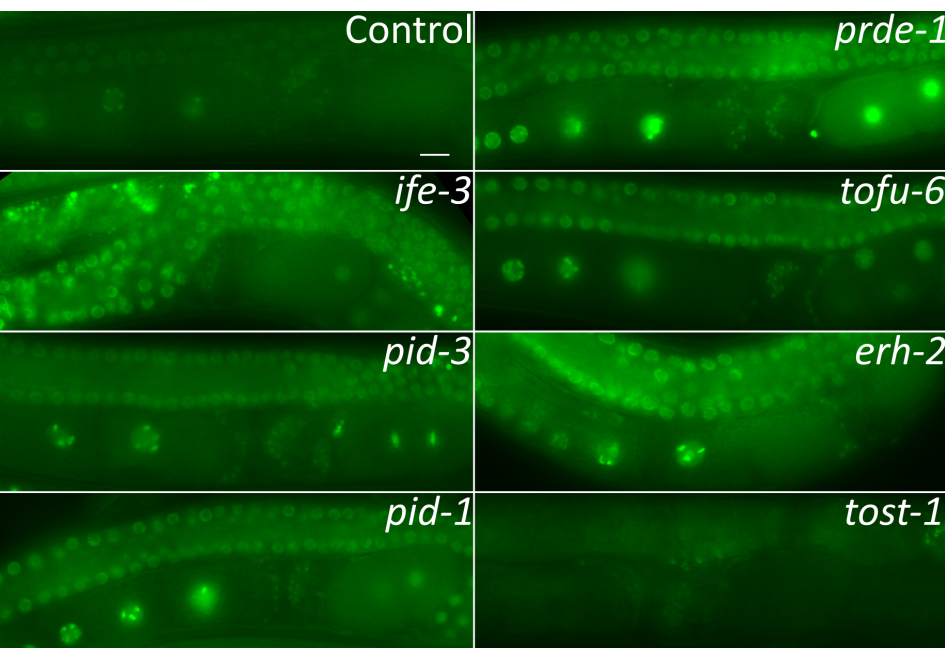

**b**

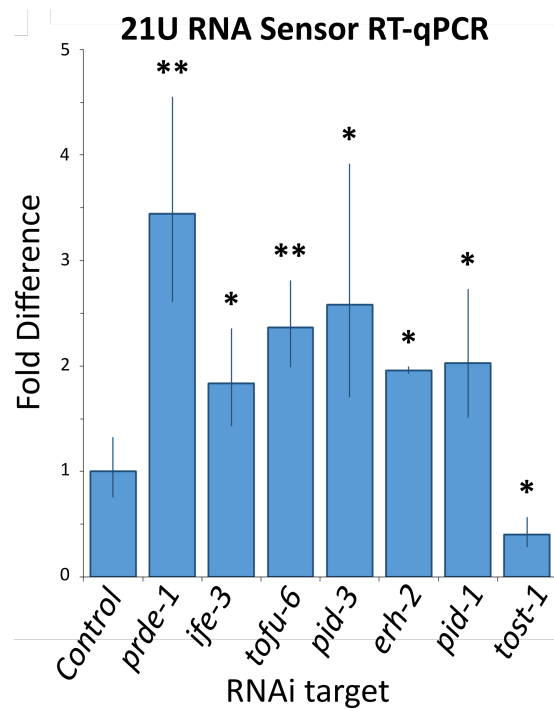

**c**

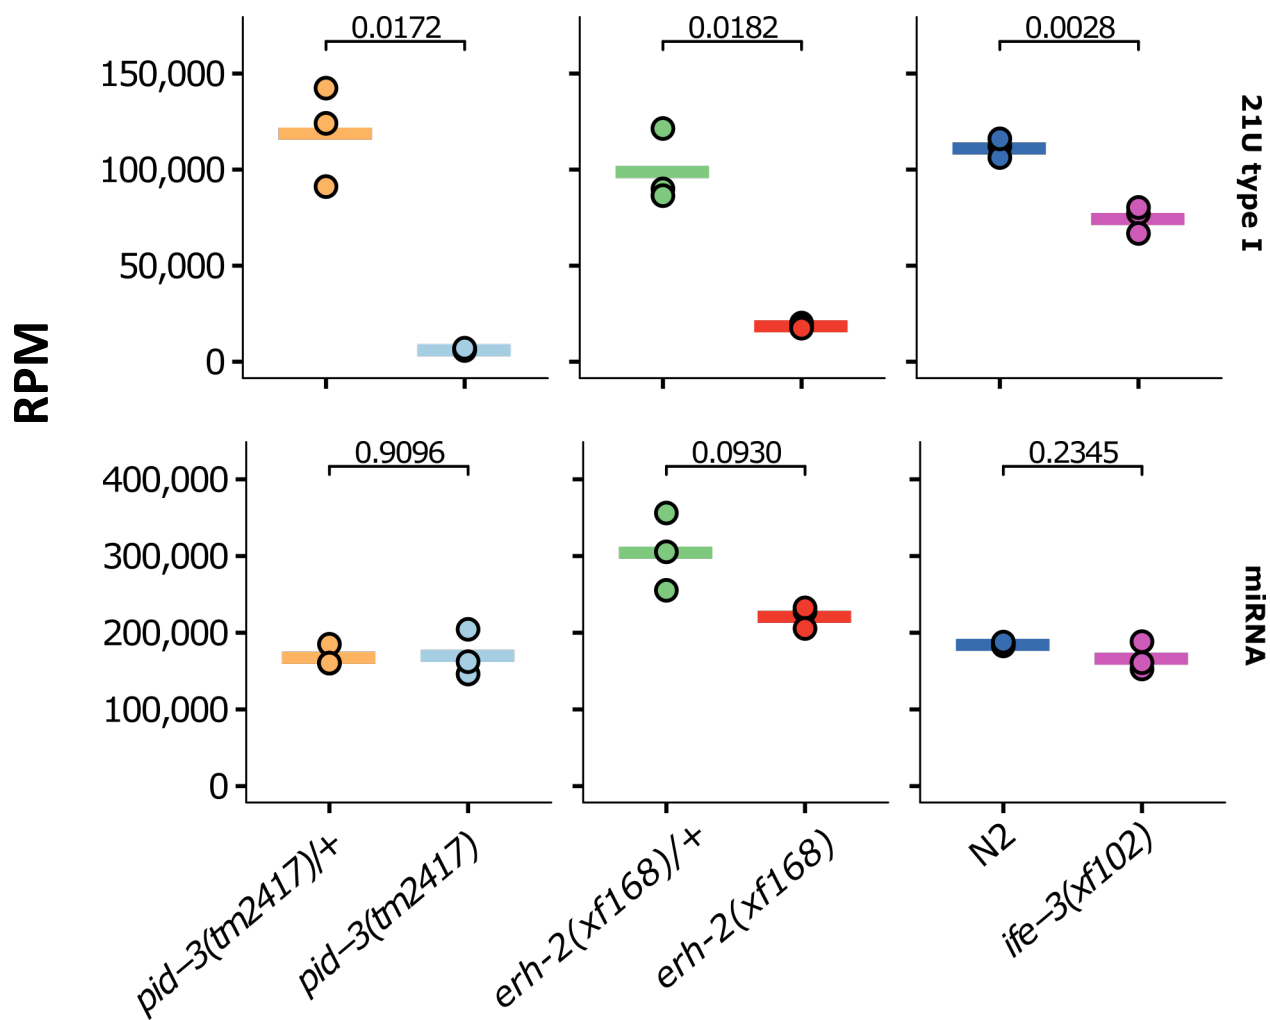

# Figure 5

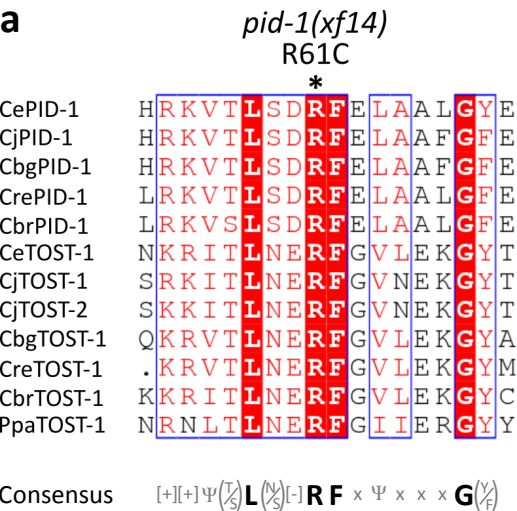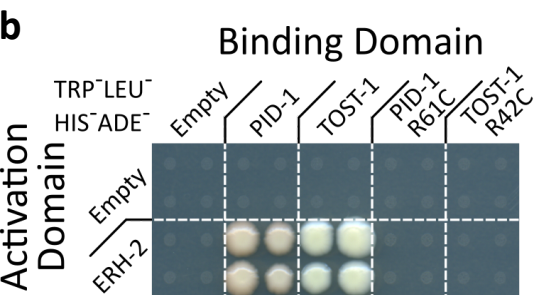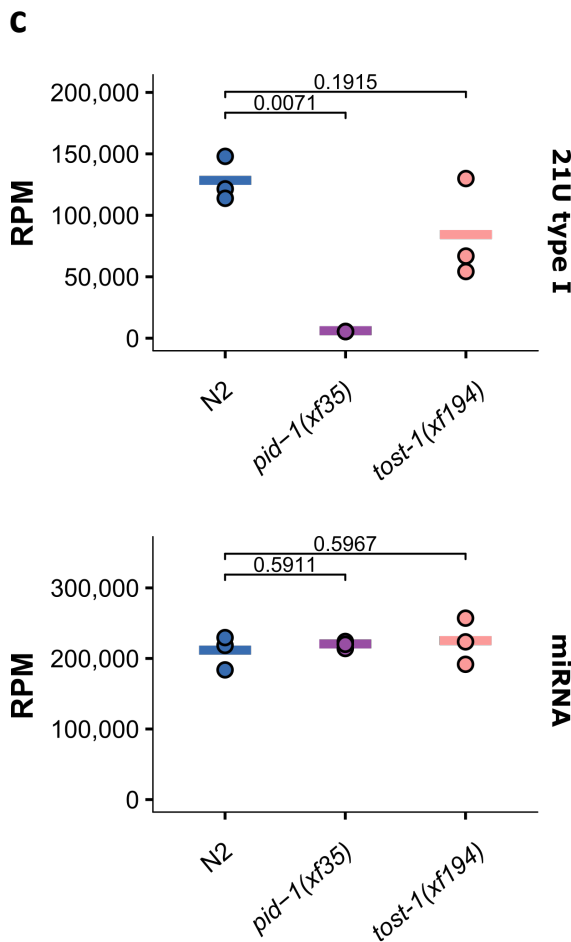

# Figure 6

a

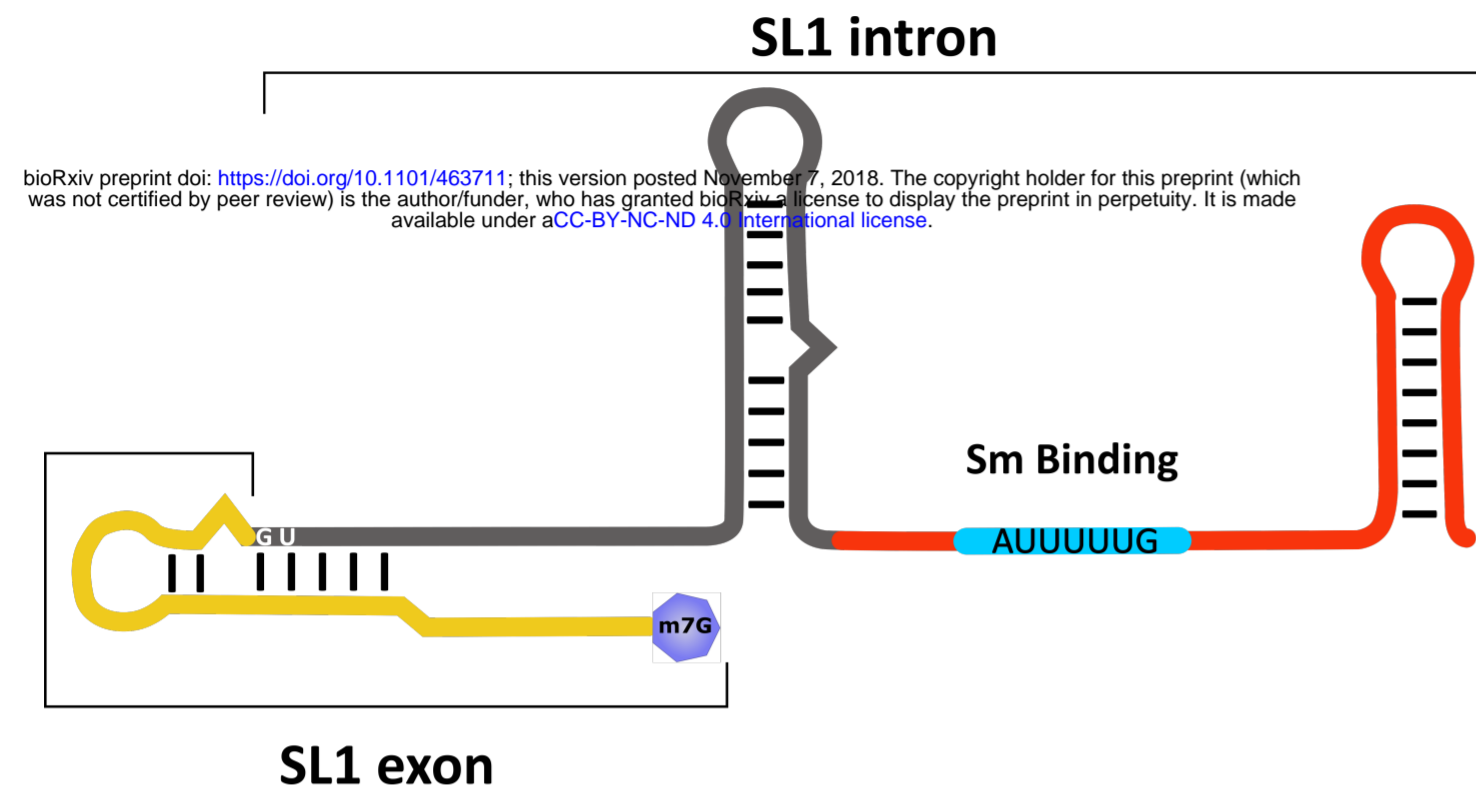

b

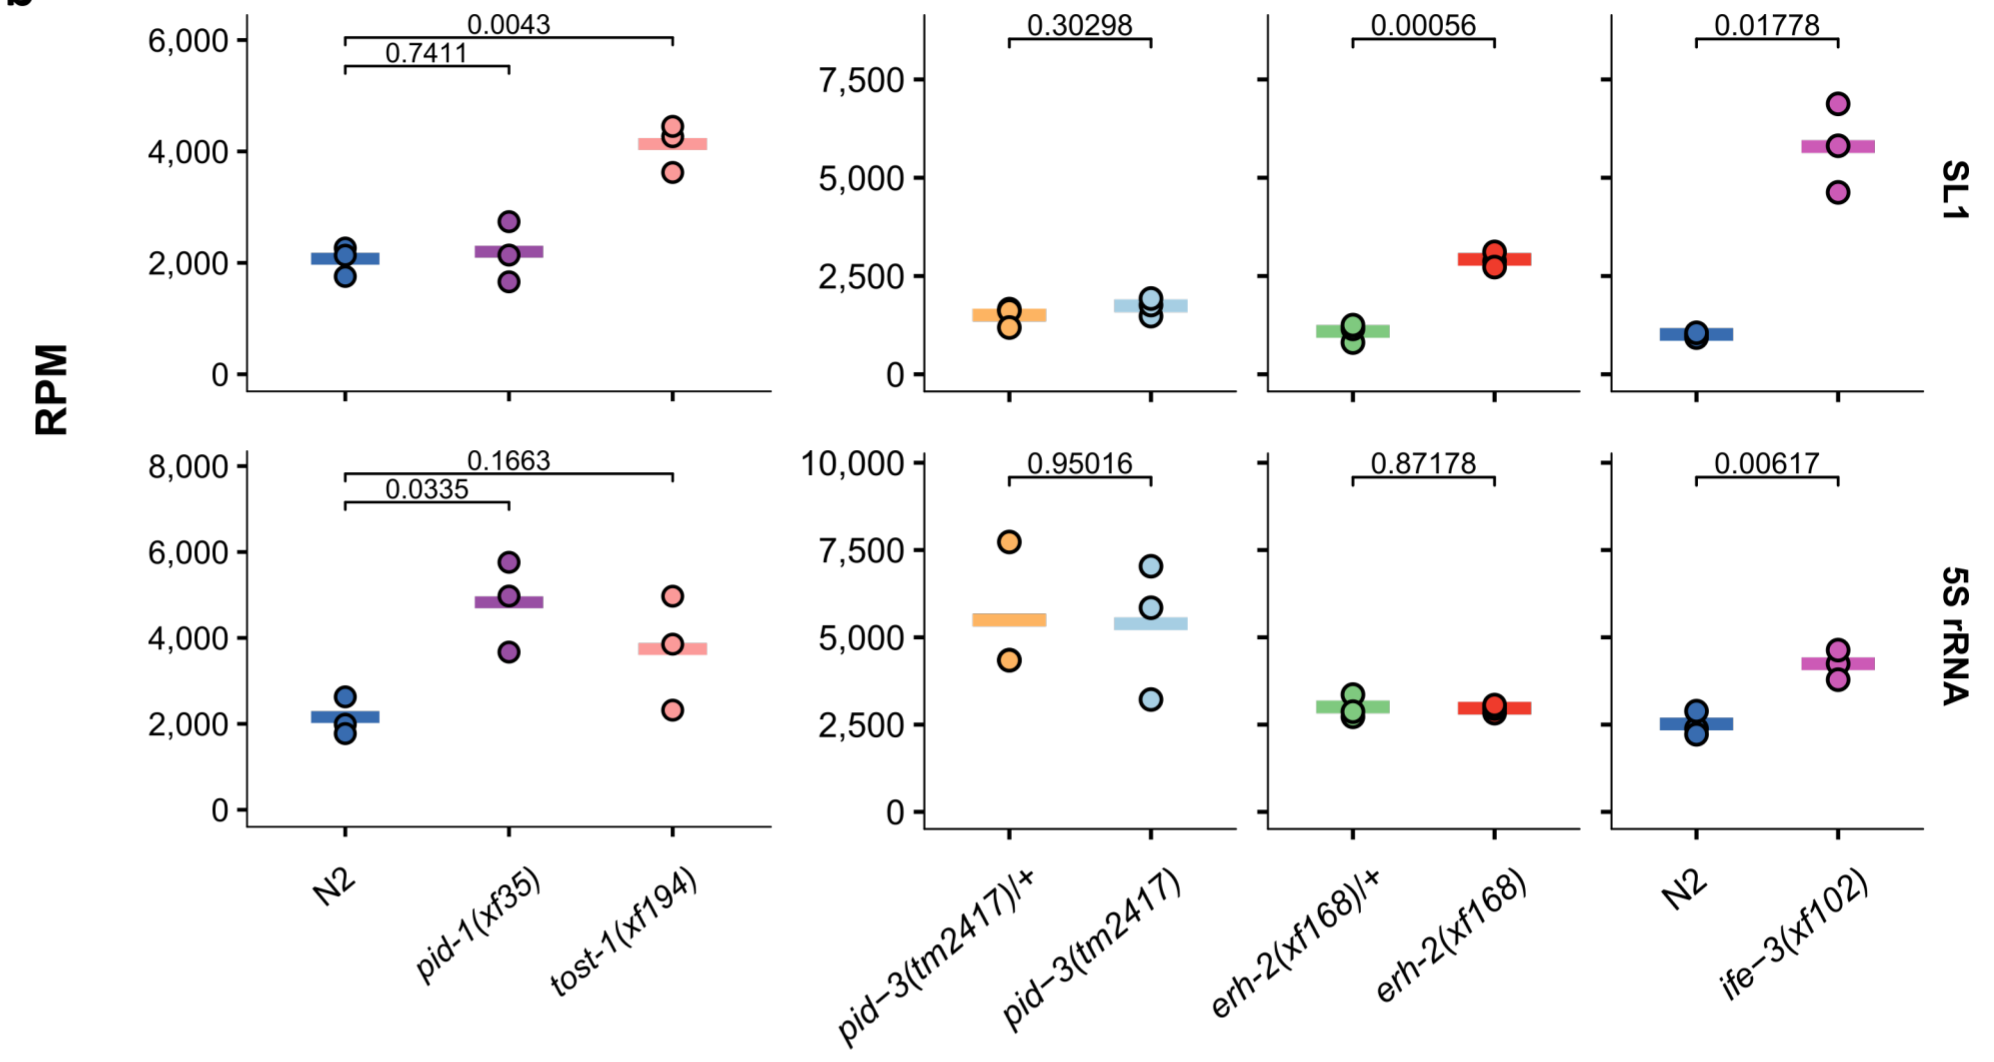

c

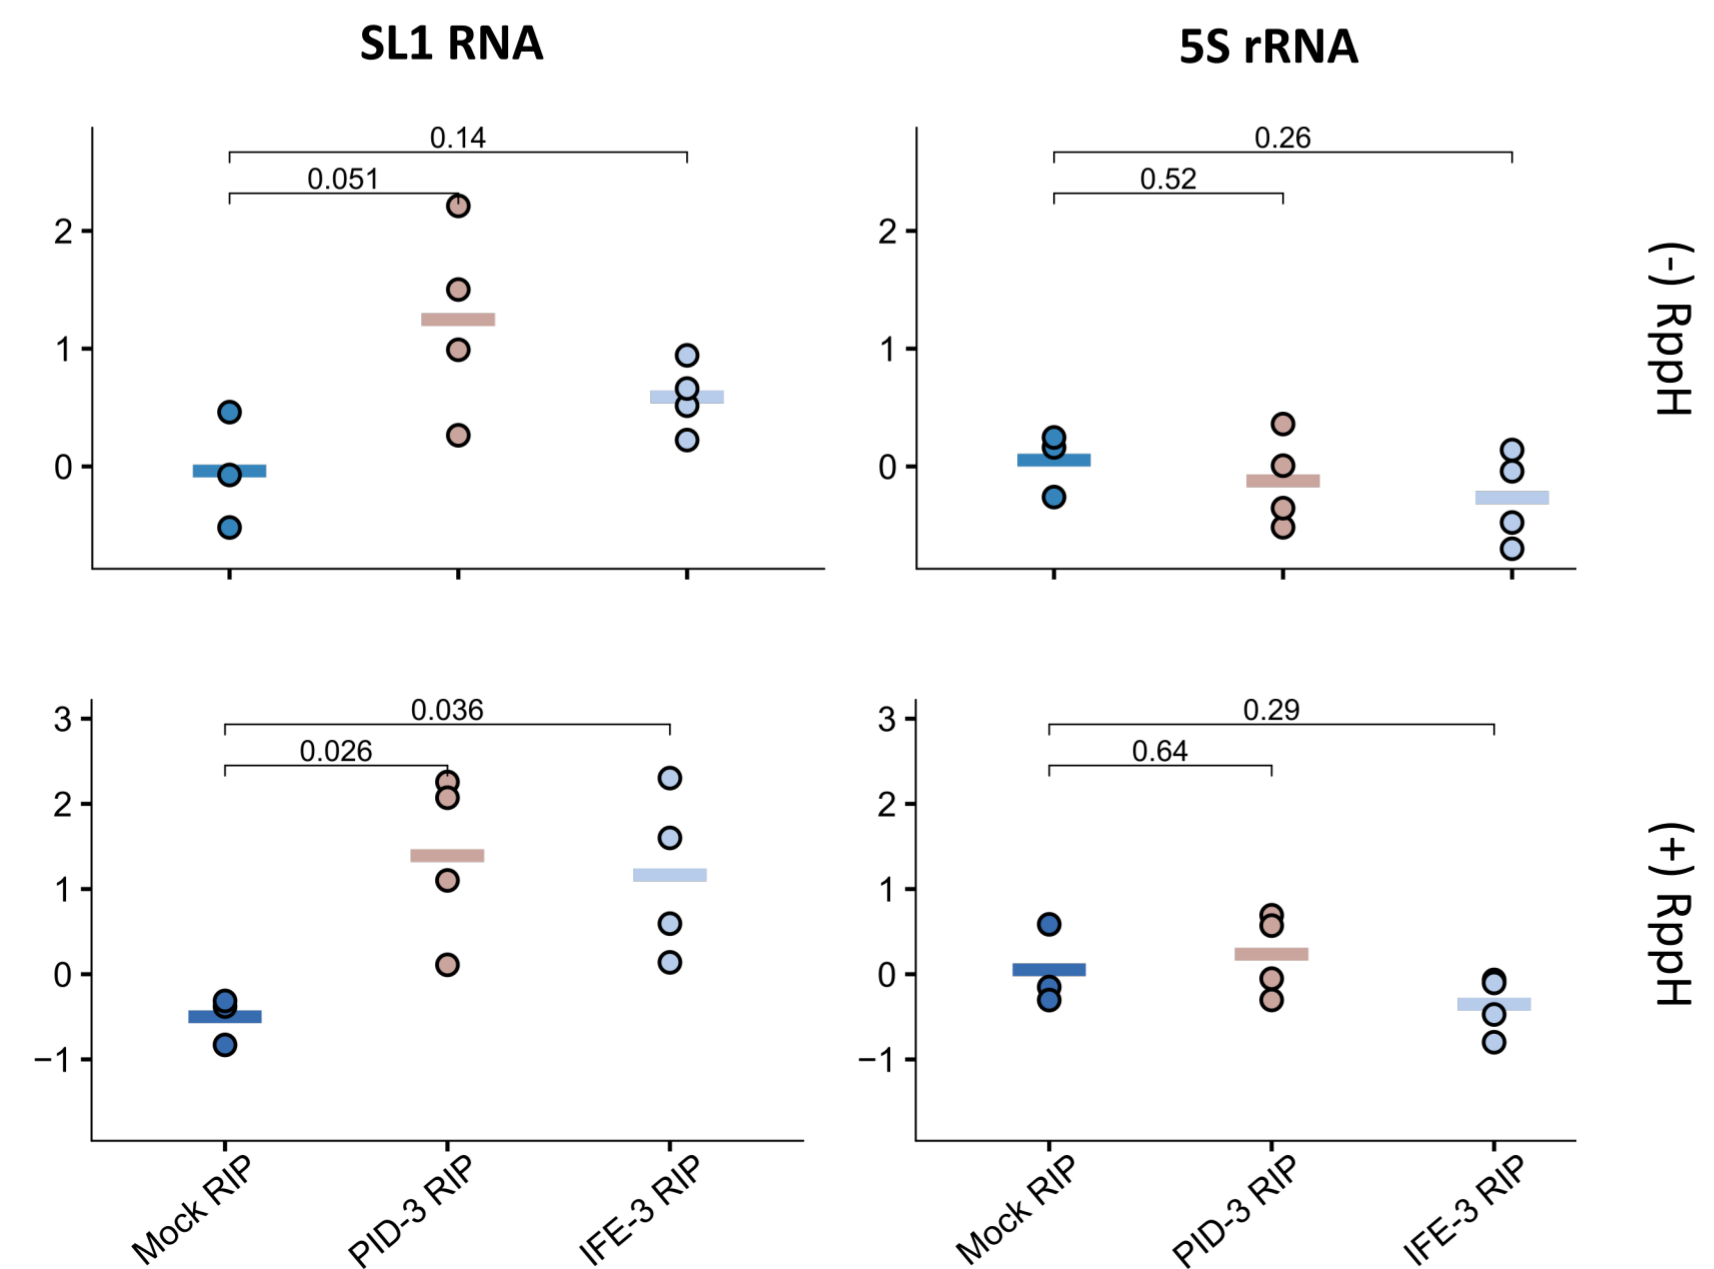

d

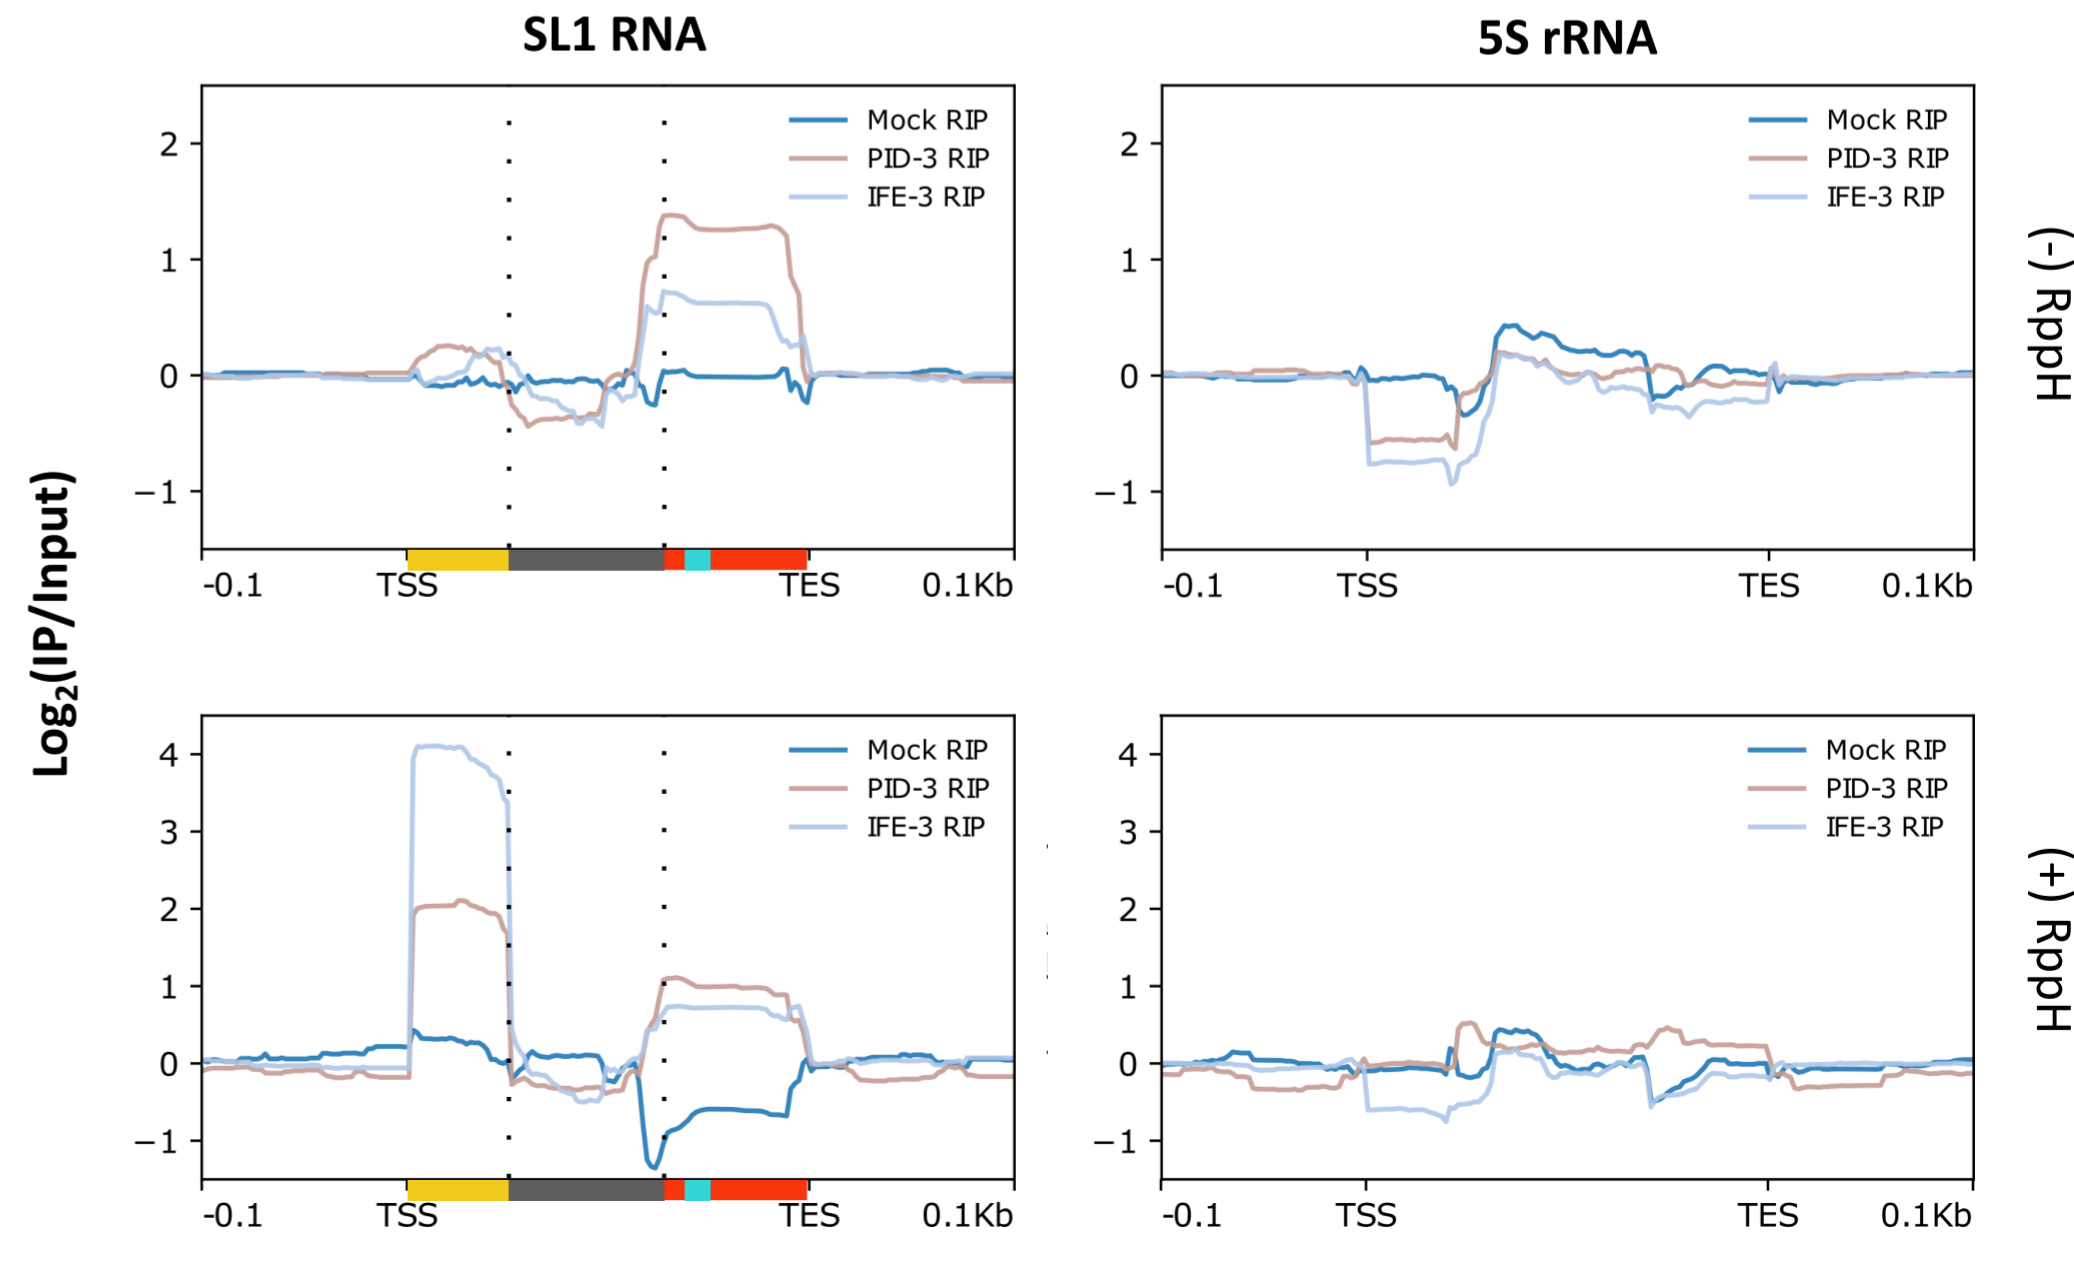

# Figure 7

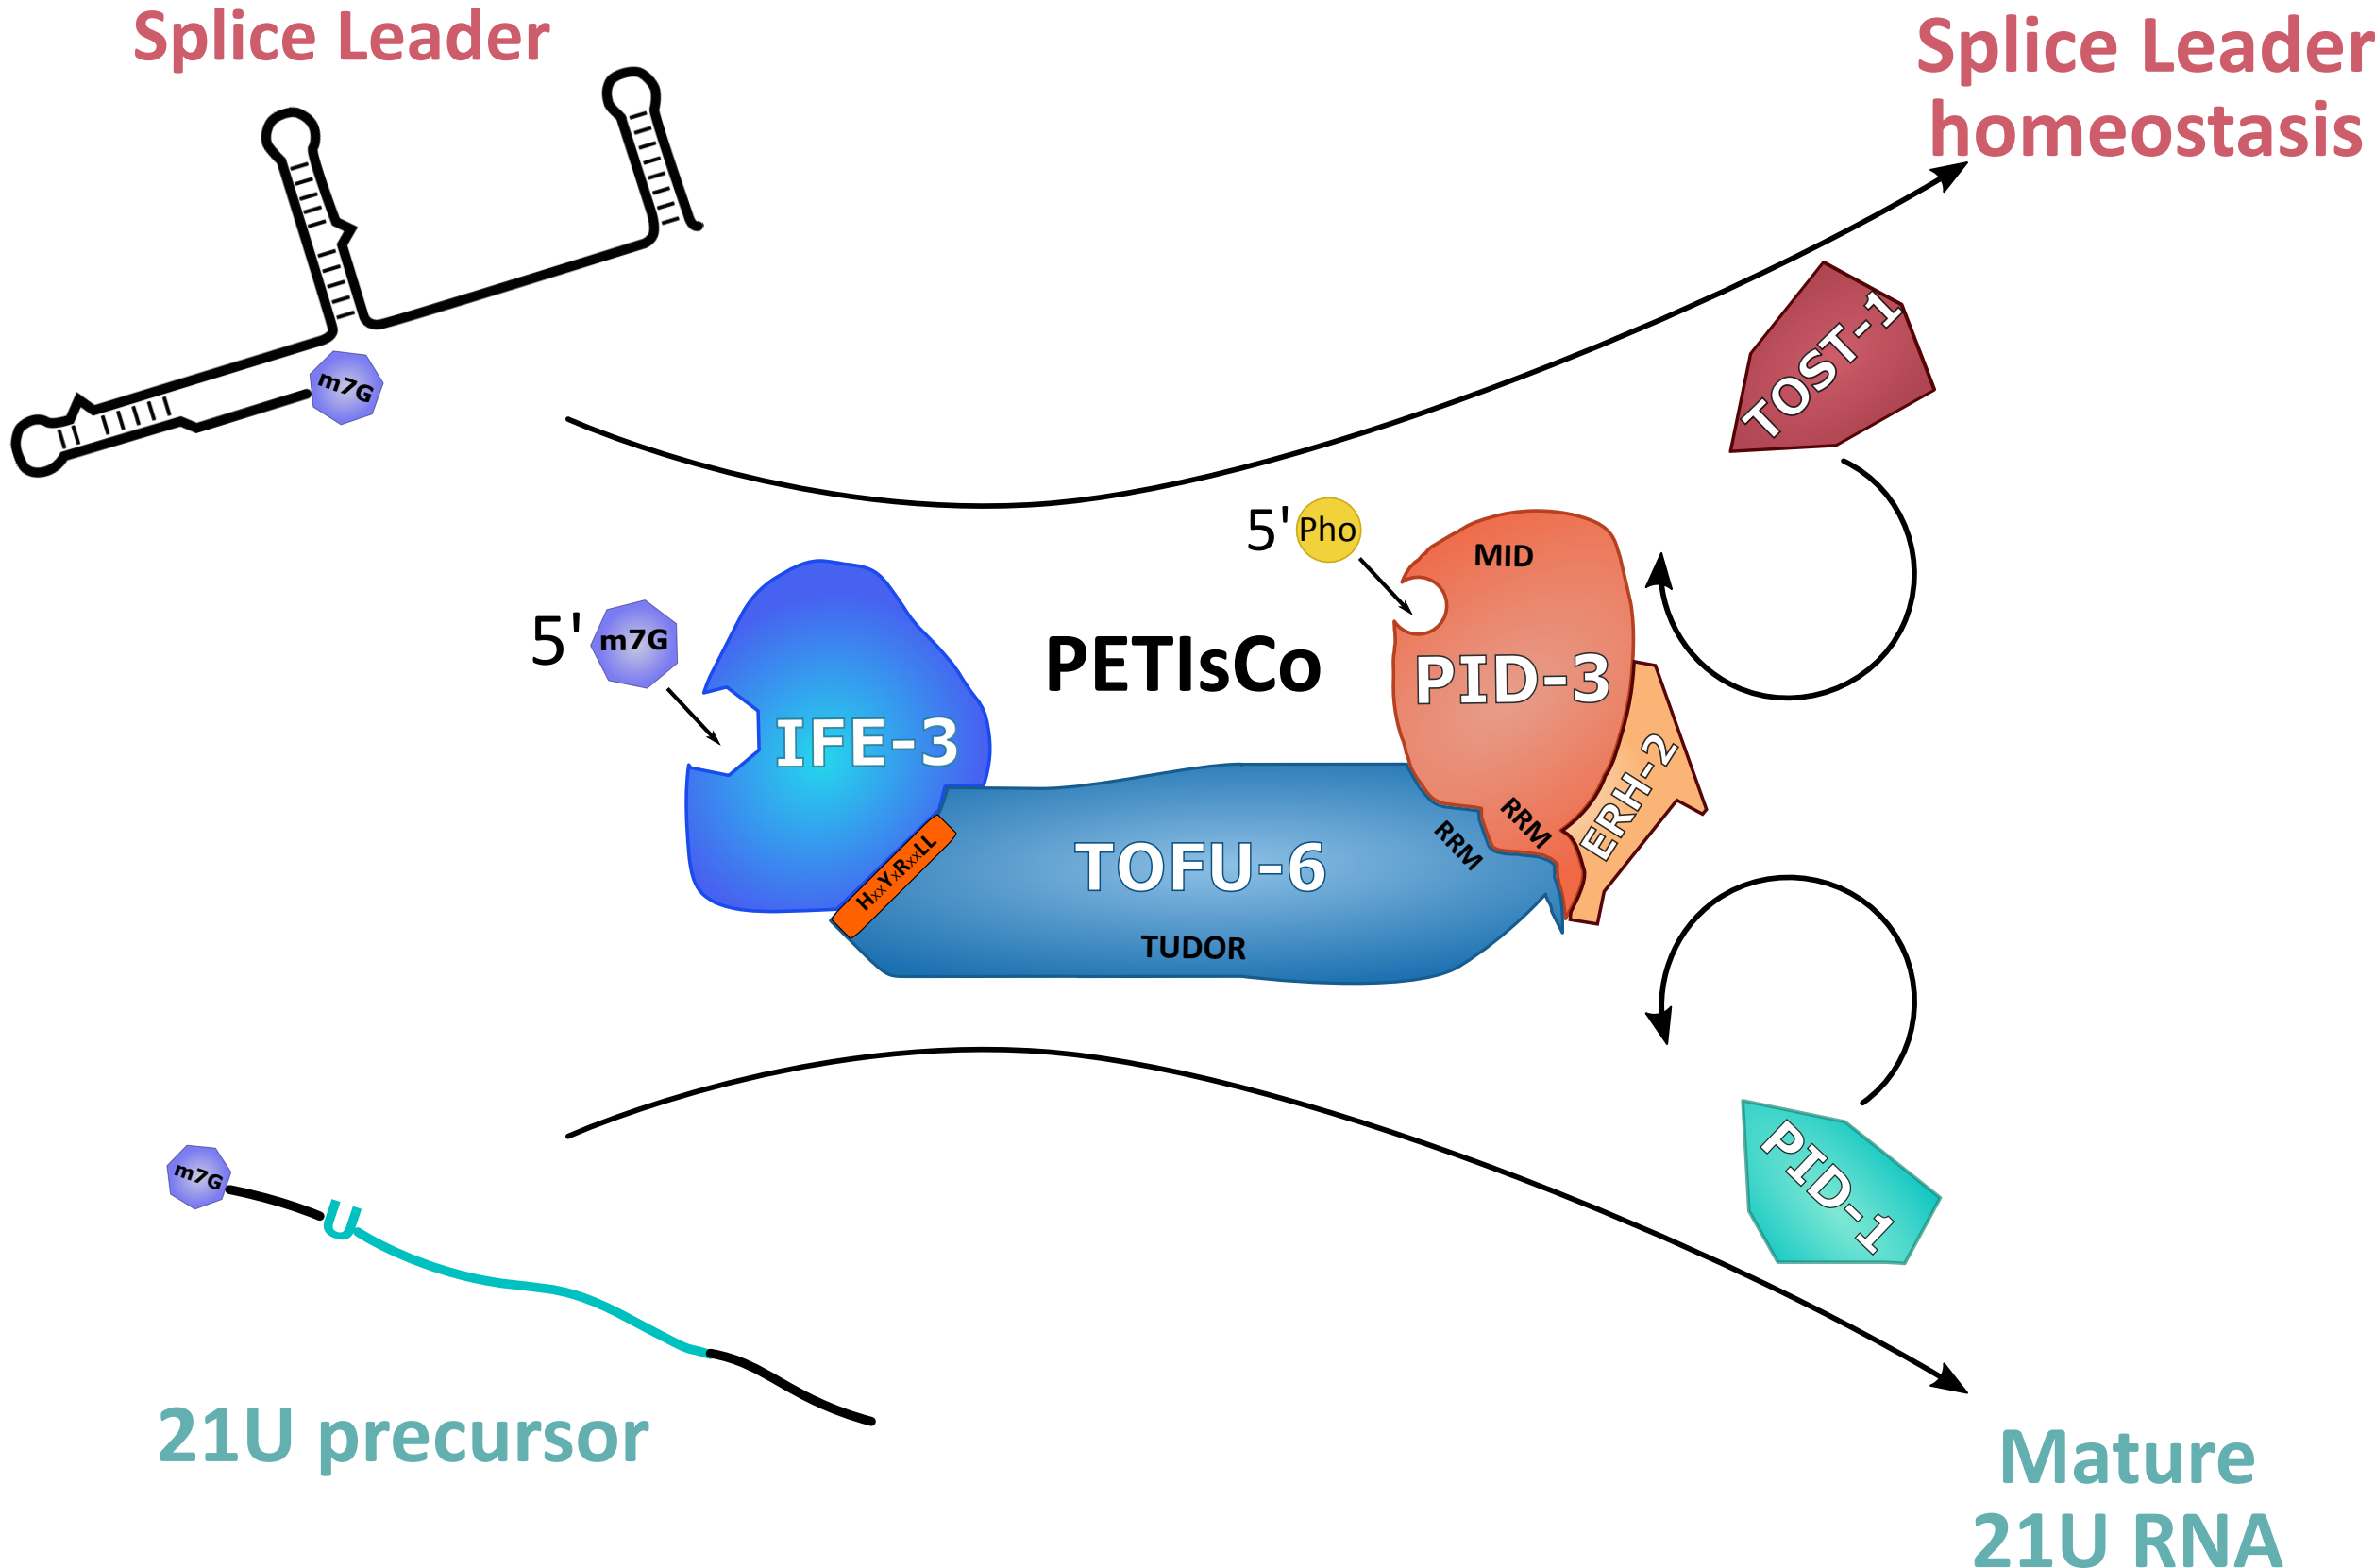

Source: https://www.biorxiv.org/content/10.1101/463711v2.full.pdf
